# Supplementary material
Source: publisher figshare collection journal article supplement (https://acs.figshare.com/ndownloader/files/5101159)

## *Supporting Information*

### **Intramolecular Participation in Alkoxy-carbenium Ion Pools**

**Seiji Suga,\* Shinkiti Suzuki, and Jun-ichi Yoshida\***

*Department of Synthetic Chemistry and Biological Chemistry, Graduate School of Engineering, Kyoto University, Katsura, Nishikyo-ku, Kyoto 615-8510, Japan*

#### **Experimental Procedures and Characterization Data**

**General Remarks.** GC analysis was performed on a gas chromatograph (SHIMADZU GC-14B) equipped with a flame ionization detector using a fused silica capillary.  $^1\text{H}$  and  $^{13}\text{C}$  NMR spectra were recorded in  $\text{CDCl}_3$  on a Varian Gemini 2000, Varian MERCURYplus-400 or JEOL ECA-600 spectrometer with  $\text{Me}_4\text{Si}$  as an internal standard unless otherwise noted. Mass spectra were obtained on JEOL JMS SX-102A mass spectrometer. IR spectra were measured with a SHIMADZU FTIR 8100 spectrometer. Thin-layer chromatography (TLC) was carried out by using Merck precoated silica gel F<sub>254</sub> plates (thickness 0.25 mm). Gel permeation chromatography (GPC) was carried out on Japan Analytical Industry LC-908 equipped with JAIGEL-1H and 2H using  $\text{CHCl}_3$  as eluant. All reactions were carried out under Ar atmosphere unless otherwise noted.

**Materials.** Tetrabutylammonium tetrafluoroborate was purchased from TCI and dried at 50 °C/1 mmHg overnight before use. Dichloromethane was washed with water, distilled from  $\text{P}_2\text{O}_5$ , redistilled from dried  $\text{K}_2\text{CO}_3$  to remove a trace amount of acid, and stored over molecular sieves 4A.  $\alpha$ -Silyl ethers **4a-4d** were prepared according to the method that we reported previously.<sup>1</sup>

**Generation of Alkoxy-carbenium Ions. Typical Procedure.** The anodic oxidation was carried out in an H-type divided cell (4G glass filter) equipped with a carbon felt anode (Nippon Carbon JF-20-P7, ca. 320 mg, dried at 250 °C/1 mmHg for 1 h before use) and a platinum plate cathode (40 mm x 20 mm). In the anodic chamber was placed a solution of  $\alpha$ -silyl ether (0.4 mmol) in 0.3 M  $\text{Bu}_4\text{NBF}_4/\text{CH}_2\text{Cl}_2$  (8.0 mL). In the cathodic chamber were placed 0.3 M  $\text{Bu}_4\text{NBF}_4/\text{CH}_2\text{Cl}_2$  (8.0 mL) and trifluoromethanesulfonic acid (150.1 mg, 1.0 mmol). The constant current electrolysis

(8 mA) was carried out at -78 °C with magnetic stirring until 2.5 F/mol of electricity was consumed.

**3-(2-Methoxyethoxymethyl)cyclohexene.** Prepared from **4a** (59.4 mg, 0.366 mmol) and 3-(trimethylsilyl)cyclohexene (146.6 mg, 0.950 mmol). After stirred for 60 min, the reaction mixture was added triethylamine (219.7 mg, 2.171 mmol) at -78 °C. Purified with flash chromatography (pentane/Et<sub>2</sub>O 15:1 to 7:1) (39.8 mg, 64%): TLC *R<sub>f</sub>* 0.56 (hexane/EtOAc 5:1); <sup>1</sup>H NMR (400 MHz, CDCl<sub>3</sub>) δ 1.30-1.40 (m, 1H), 1.49-1.59 (m, 1H), 1.67-1.84 (m, 2H), 1.96-2.03 (m, 2H), 2.38-2.49 (m, 1H), 3.33-3.37 (m, 2H), 3.40 (s, 3H), 3.54-3.62 (m, 4H), 3.50 (t, 2H, *J* = 6.5 Hz), 5.59-5.64 (m, 1H), 5.72-5.78 (m, 1H); <sup>13</sup>C NMR (75 MHz, CDCl<sub>3</sub>) δ 20.7, 25.3, 25.9, 35.6, 59.0, 70.2, 71.9, 75.7, 128.2, 128.5; IR (neat) 2936, 2863, 1123 cm<sup>-1</sup>; LRMS (EI) *m/e* 170 (M<sup>+</sup>), 95 (M<sup>+</sup>-C<sub>3</sub>H<sub>7</sub>O<sub>2</sub>); HRMS (EI) calcd for C<sub>10</sub>H<sub>18</sub>O<sub>2</sub> 170.1307, found 170.1303.

**3-(2-Methoxyethoxy)-1-phenylpropan-1-one.** Prepared from **4a** (65.7 mg, 0.405 mmol) and 1-phenyl-1-trimethylsilyloxyethylene (161.3 mg, 0.839 mmol) (reaction time, 15 min), followed by the aqueous work up, and purified with flash chromatography (hexane/EtOAc 7:1 to 3:1) (22.4 mg, 27%): TLC *R<sub>f</sub>* 0.16 (hexane/EtOAc 5:1); <sup>1</sup>H NMR (400 MHz, CDCl<sub>3</sub>) δ 3.31 (t, 2H, *J* = 6.6 Hz), 3.38 (s, 3H), 3.53-3.55 (m, 2H), 3.64-3.67 (m, 2H), 3.92 (t, 2H, *J* = 6.8 Hz), 7.43-7.47 (m, 2H), 7.53-7.57 (m, 1H), 7.94-7.96 (m, 2H); <sup>13</sup>C NMR (100 MHz, CDCl<sub>3</sub>) δ 38.8, 59.0, 66.4, 70.4, 71.7, 127.9, 128.4, 132.9, 136.7, 197.9; IR (neat) 2872, 1684, 1122 cm<sup>-1</sup>; LRMS (FAB) *m/e* 209 (MH<sup>+</sup>), 105 (M<sup>+</sup>-C<sub>5</sub>H<sub>11</sub>O<sub>2</sub>); HRMS (FAB) calcd for C<sub>12</sub>H<sub>17</sub>O<sub>3</sub> 209.1178, found 209.1177.

**3-(3-Methoxypropoxymethyl)cyclohexene.** Prepared from **4b** (70.7 mg, 0.401 mmol) and 3-(trimethylsilyl)cyclohexene (133.5 mg, 0.865 mmol). After stirred for 60 min, the reaction mixture was added triethylamine (210.5 mg, 2.080 mmol) at -78 °C. Purified with flash chromatography (hexane/EtOAc 20:1 to 10:1) (56.6 mg, 77%): TLC *R<sub>f</sub>* 0.50 (hexane/EtOAc 5:1); <sup>1</sup>H NMR (300 MHz, CDCl<sub>3</sub>) δ 1.25-1.38 (m, 2H), 1.48-1.83 (m, 2H), 1.84 (t, 2H, *J* = 6.4 Hz), 1.95-2.03 (m, 2H), 2.32-2.46 (m, 1H), 3.28 (d, 2H, *J* = 6.9 Hz), 3.33 (s, 3H), 3.46 (t, 2H, *J* = 6.3 Hz), 3.50 (t, 2H, *J* = 6.5 Hz), 5.54-5.64 (m, 1H), 5.72-5.80 (m, 1H); <sup>13</sup>C NMR (75 MHz, CDCl<sub>3</sub>) δ 20.9, 25.3, 26.0, 30.0, 35.8, 58.6, 67.8, 69.8, 75.2, 128.4, 128.5; IR (neat) 2936, 2861, 1119 cm<sup>-1</sup>; LRMS (FAB) *m/e* 185 (M-H<sup>+</sup>), 95 (M<sup>+</sup>-C<sub>4</sub>H<sub>9</sub>O<sub>2</sub>).

**3-(3-Methoxypropoxy)-1-phenylpropan-1-one.** Prepared from **4b** (71.2 mg, 0.404 mmol) and 1-phenyl-1-trimethylsilyloxyethylene (159.5 mg, 0.829 mmol) (reaction time, 15 min) followed by the aqueous work up, and purified with flash chromatography (hexane/EtOAc 7:1 to 3:1) (53.8 mg, 60%): TLC *R<sub>f</sub>* 0.37

(hexane/EtOAc 3:1);  $^1\text{H}$  NMR (300 MHz,  $\text{CDCl}_3$ )  $\delta$  1.83 (tt, 2H,  $J = 6.5$  Hz,  $J = 6.5$  Hz), 3.25 (t, 2H,  $J = 6.5$  Hz), 3.31 (s, 3H), 3.42 (t, 2H,  $J = 6.3$  Hz), 3.55 (t, 2H,  $J = 6.5$  Hz), 3.86 (t, 2H,  $J = 6.6$  Hz), 7.44-7.49 (m, 2H), 7.55-7.62 (m, 1H), 7.95-7.98 (m, 2H);  $^{13}\text{C}$  NMR (100 MHz,  $\text{CDCl}_3$ )  $\delta$  29.9, 38.8, 58.6, 66.1, 68.0, 69.6, 127.9, 128.4, 132.9, 126.8, 198.1; IR (neat) 2872, 1683, 1115  $\text{cm}^{-1}$ ; LRMS (FAB)  $m/e$  223 ( $\text{MH}^+$ ), 105 ( $\text{M}^+ - \text{C}_6\text{H}_{13}\text{O}_2$ ); HRMS (FAB) calcd for  $\text{C}_{13}\text{H}_{19}\text{O}_3$  223.1334, found 223.1333.

**Methyl 3-(3-Methoxypropoxy)-2,2-dimethylpropionate.** Prepared from **4b** (71.2 mg, 0.404 mmol) and dimethylketene methyl trimethylsilyl acetal (135.7 mg, 0.778 mmol) (reaction time, 15 min) followed by the aqueous work up, and purified with flash chromatography (hexane/EtOAc 15:1 to 7:1) (46.0 mg, 56%): TLC  $R_f$  0.52 (hexane/EtOAc 3:1);  $^1\text{H}$  NMR (300 MHz,  $\text{CDCl}_3$ )  $\delta$  1.18 (s, 6H), 1.80 (tt, 2H,  $J = 6.3$  Hz), 3.32 (s, 3H), 3.41 (s, 2H), 3.42 (t, 2H,  $J = 6.5$  Hz), 3.48 (t, 2H,  $J = 6.5$  Hz), 3.68 (s, 3H);  $^{13}\text{C}$  NMR (100 MHz,  $\text{CDCl}_3$ )  $\delta$  22.5, 26.2, 26.4, 43.7, 51.8, 58.5, 71.2, 72.5, 176.9; IR (neat) 1874, 1733, 1119  $\text{cm}^{-1}$ ; LRMS (FAB)  $m/e$  205 ( $\text{MH}^+$ ); HRMS (FAB) calcd for  $\text{C}_{10}\text{H}_{21}\text{O}_4$  205.1440, found 205.1444.

**3-(4-Methoxybutoxymethyl)cyclohexene.** Prepared from **4c** (60.6 mg, 0.318 mmol) and 3-(trimethylsilyl)cyclohexene (100.7 mg, 0.653 mmol) (reaction time, 15 min). Purified with flash chromatography (hexane/EtOAc 10:1) (45.3 mg, 72%): TLC  $R_f$  0.23 (hexane/EtOAc 10:1);  $^1\text{H}$  NMR (300 MHz,  $\text{CDCl}_3$ )  $\delta$  1.25-1.38 (m, 2H), 1.46-1.83 (m, 6H), 1.94-2.02 (m, 2H), 2.30-2.44 (m, 1H), 3.27 (d, 2H,  $J = 6.6$  Hz), 3.33 (s, 3H), 3.36-3.49 (m, 4H), 5.56-5.64 (m, 1H), 5.70-5.78 (m, 1H);  $^{13}\text{C}$  NMR (100 MHz,  $\text{CDCl}_3$ )  $\delta$  21.0, 25.5, 26.1, 26.4, 26.5, 35.9, 58.5, 70.7, 72.6, 75.1, 76.7, 128.3, 128.3; IR (neat) 2926, 2859, 1119  $\text{cm}^{-1}$ ; LRMS (FAB)  $m/e$  199 ( $\text{MH}^+$ ), 95 ( $\text{M}^+ - \text{C}_5\text{H}_{11}\text{O}_2$ ); HRMS (FAB) calcd for  $\text{C}_{12}\text{H}_{23}\text{O}_2$  199.1698, found 199.1699.

**3-(4-Methoxybutoxy)-1-phenylpropan-1-one.** Prepared from **4c** (79.0 mg, 0.415 mmol) and 1-phenyl-1-trimethylsilyloxyethylene (173.4 mg, 0.902 mmol) (reaction time, 15 min) followed by the aqueous work up, and purified with flash chromatography (hexane/EtOAc 7:1 to 3:1) (37.3 mg, 38%): TLC  $R_f$  0.22 (hexane/EtOAc 5:1);  $^1\text{H}$  NMR (400 MHz,  $\text{CDCl}_3$ )  $\delta$  1.58-1.68 (m, 4H), 3.25 (t, 2H,  $J = 6.6$  Hz), 3.31 (s, 3H), 3.35-3.41 (m, 2H), 3.47-3.50 (m, 2H), 3.86 (t, 2H,  $J = 6.6$  Hz), 7.43-7.49 (m, 2H), 7.54-7.59 (m, 1H), 7.95-7.99 (m, 1H);  $^{13}\text{C}$  NMR (100 MHz,  $\text{CDCl}_3$ )  $\delta$  26.4, 26.4, 39.0, 58.5, 66.1, 71.0, 72.5, 128.0, 128.4, 132.9, 136.9, 198.2; IR (neat) 2870, 1685, 1115  $\text{cm}^{-1}$ ; LRMS (FAB)  $m/e$  237 ( $\text{MH}^+$ ), 105 ( $\text{M}^+ - \text{C}_7\text{H}_{15}\text{O}_2$ ); HRMS (FAB) calcd for  $\text{C}_{14}\text{H}_{21}\text{O}_3$  237.1491, found 237.1490.

**Methyl 3-(4-Methoxybutoxy)-2,2-dimethylpropionate.** Prepared from **4c** (75.7 mg, 0.398 mmol) and dimethylketene methyl trimethylsilyl acetal (154.5 mg,

0.886 mmol) (reaction time, 15 min) followed by the aqueous work up, and purified with flash chromatography (hexane/EtOAc 15:1 to 7:1) (26.3 mg, 32%): TLC  $R_f$  0.36 (hexane/EtOAc 5:1);  $^1\text{H}$  NMR (400 MHz,  $\text{CDCl}_3$ )  $\delta$  1.19 (s, 6H), 1.57-1.64 (m, 4H), 3.33 (s, 3H), 3.35-3.45 (m, 4H), 3.40 (s, 2H), 3.68 (s, 3H);  $^{13}\text{C}$  NMR (100 MHz,  $\text{CDCl}_3$ )  $\delta$  22.5, 26.2, 26.4, 43.7, 51.8, 58.5, 71.2, 72.5, 77.5, 176.9; IR (neat) 1870, 1737, 1117  $\text{cm}^{-1}$ ; LRMS (FAB)  $m/e$  219 ( $\text{MH}^+$ ), 145 ( $\text{M}^+ - \text{C}_4\text{H}_9\text{O}$ ); HRMS (CI) calcd for  $\text{C}_{10}\text{H}_{19}\text{O}_3$  ( $\text{M}^+ - \text{OCH}_3$ ) 187.1334, found 187.1333.

**3-(5-Methoxypentoxymethyl)cyclohexene.** Prepared from **4d** (80.5 mg, 0.394 mmol) and 3-(trimethylsilyl)cyclohexene (128.7 mg, 0.834 mmol) (reaction time, 15 min). Purified with flash chromatography (hexane/EtOAc 30:1 to 10:1) (34.4 mg, 41%): TLC  $R_f$  0.56 (hexane/EtOAc 10:1);  $^1\text{H}$  NMR (300 MHz,  $\text{CDCl}_3$ )  $\delta$  1.25-1.47 (m, 3H), 1.49-1.83 (m, 7H), 1.95-2.02 (m, 2H), 2.31-2.43 (m, 1H), 3.27 (d, 2H,  $J = 6.9$  Hz), 3.33 (s, 3H), 3.37 (t, 2H,  $J = 6.5$  Hz), 3.42 (t, 2H,  $J = 6.5$  Hz), 5.56-5.63 (m, 1H), 5.71-5.78 (m, 1H);  $^{13}\text{C}$  NMR (100 MHz,  $\text{CDCl}_3$ )  $\delta$  21.0, 22.9, 25.5, 26.1, 29.5, 29.6, 35.9, 58.5, 71.0, 72.8, 75.2, 128.3, 128.3; IR (neat) 2932, 2858, 1121  $\text{cm}^{-1}$ ; LRMS (FAB)  $m/e$  213 ( $\text{M}^+$ ), 95 ( $\text{M}^+ - \text{C}_6\text{H}_{13}\text{O}_2$ ); HRMS (FAB) calcd for  $\text{C}_{10}\text{H}_{17}\text{NO}_4$  213.1855, found 213.1860.

## Reference for Supporting information

1. Suga, S.; Miyamoto, K.; Watanabe, M.; Yoshida J. *Appl. Organometal. Chem.* **1999**, *13*, 469.

$^1\text{H}$  and  $^{13}\text{C}$  NMR spectra of the above-described compounds are listed as follows:

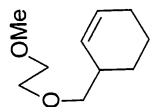

<sup>1</sup>H 400 MHz CDCl<sub>3</sub>

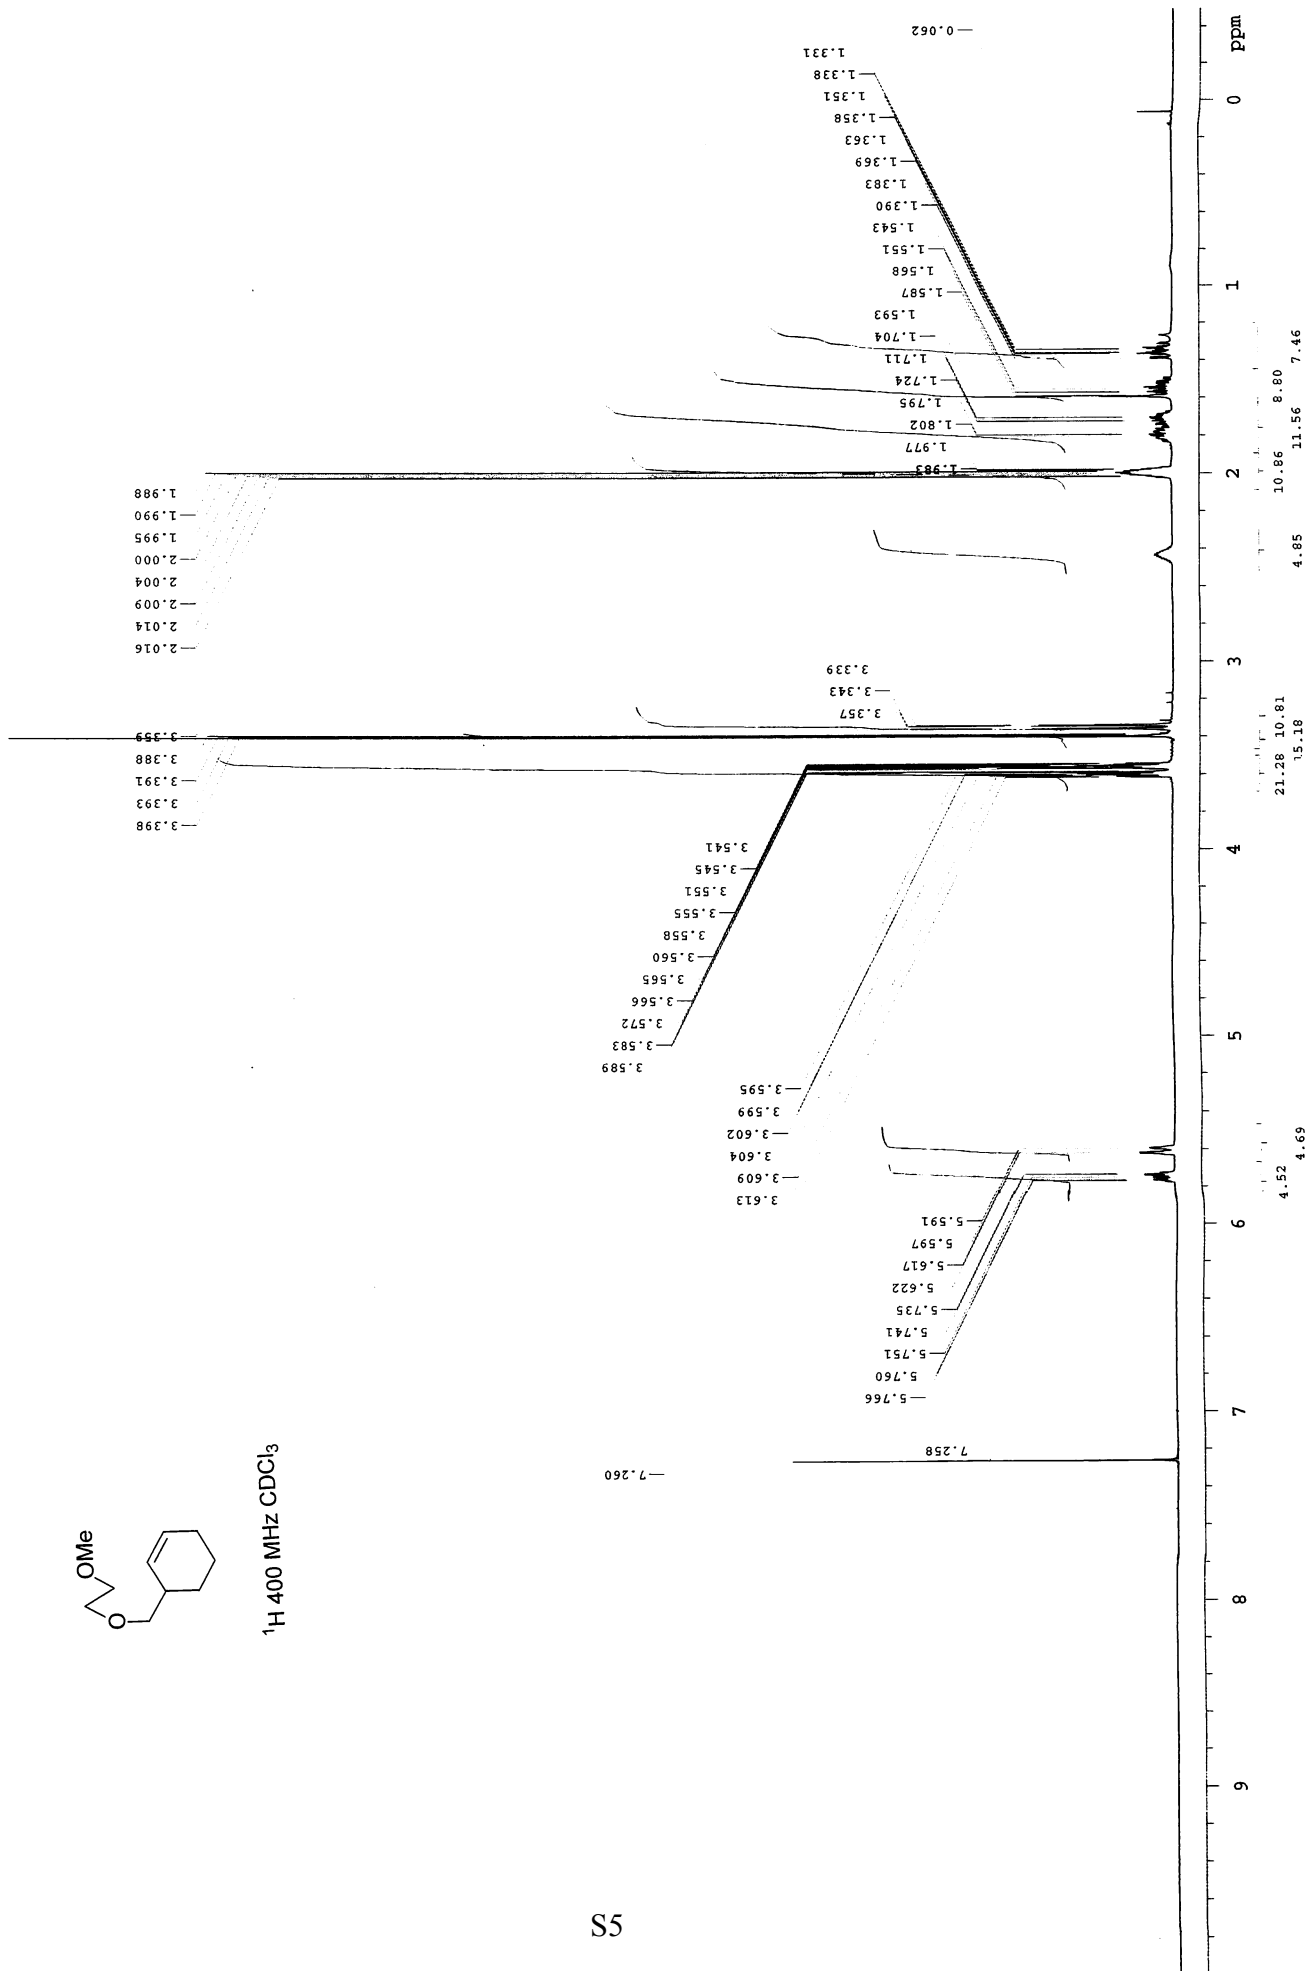

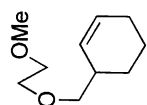

$^{13}\text{C}$  75 MHz  $\text{CDCl}_3$

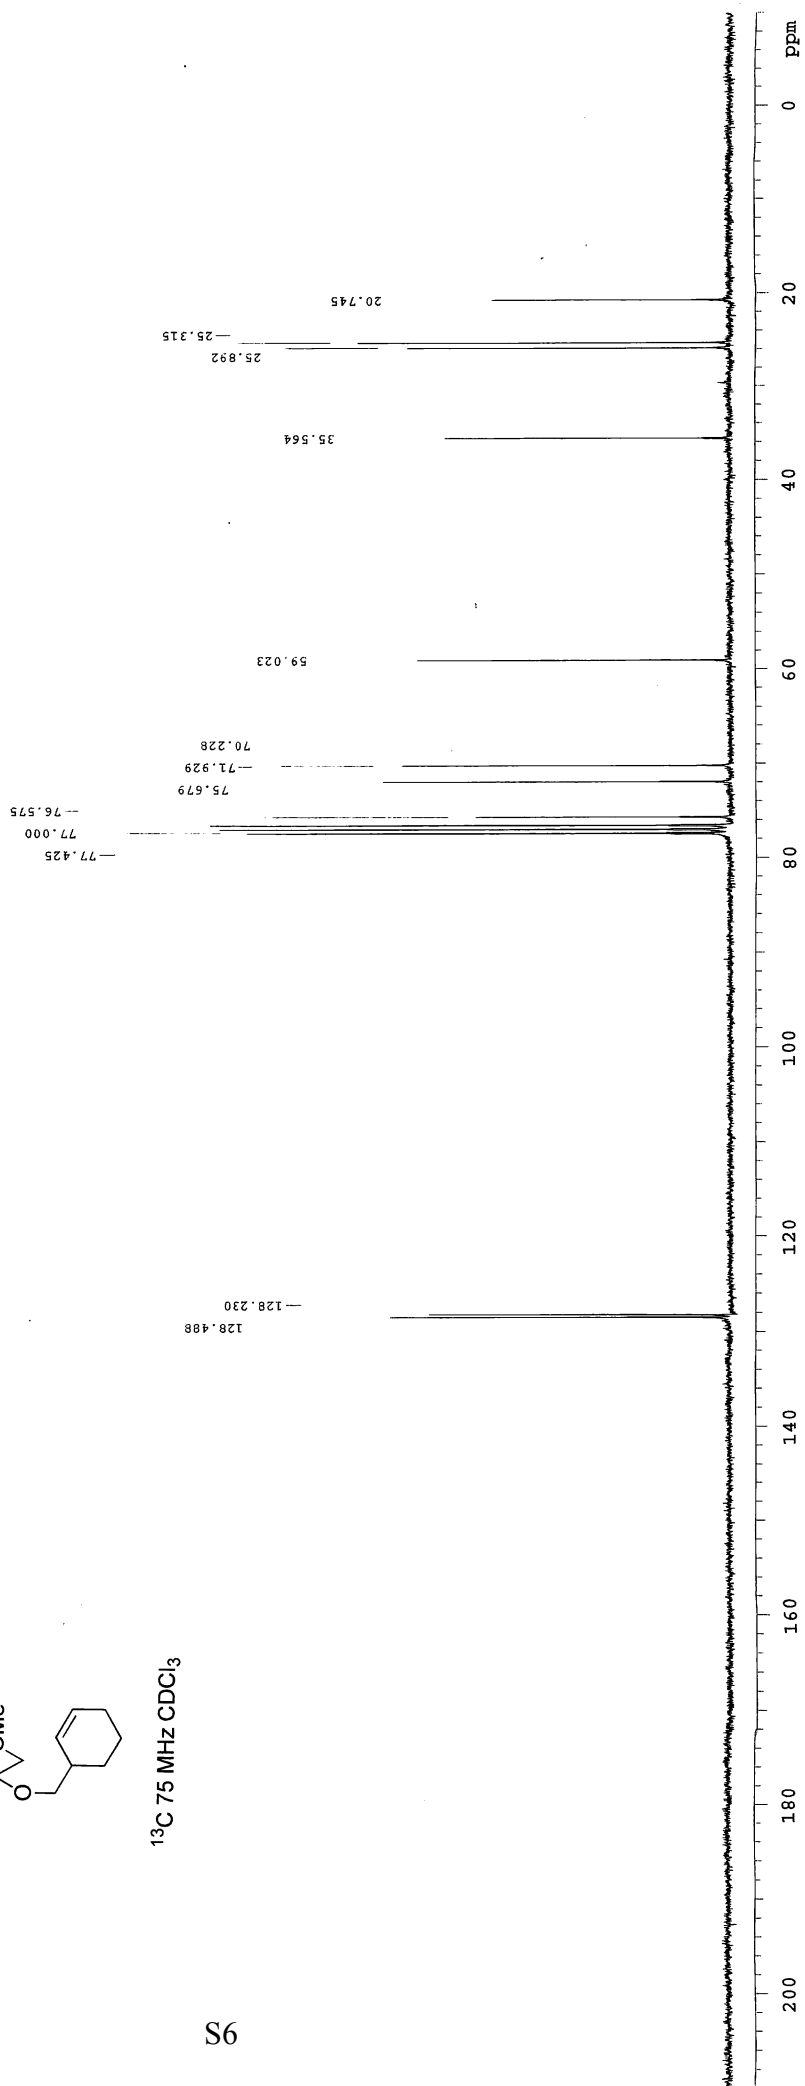

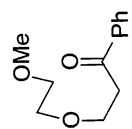

<sup>1</sup>H 400 MHz CDCl<sub>3</sub>

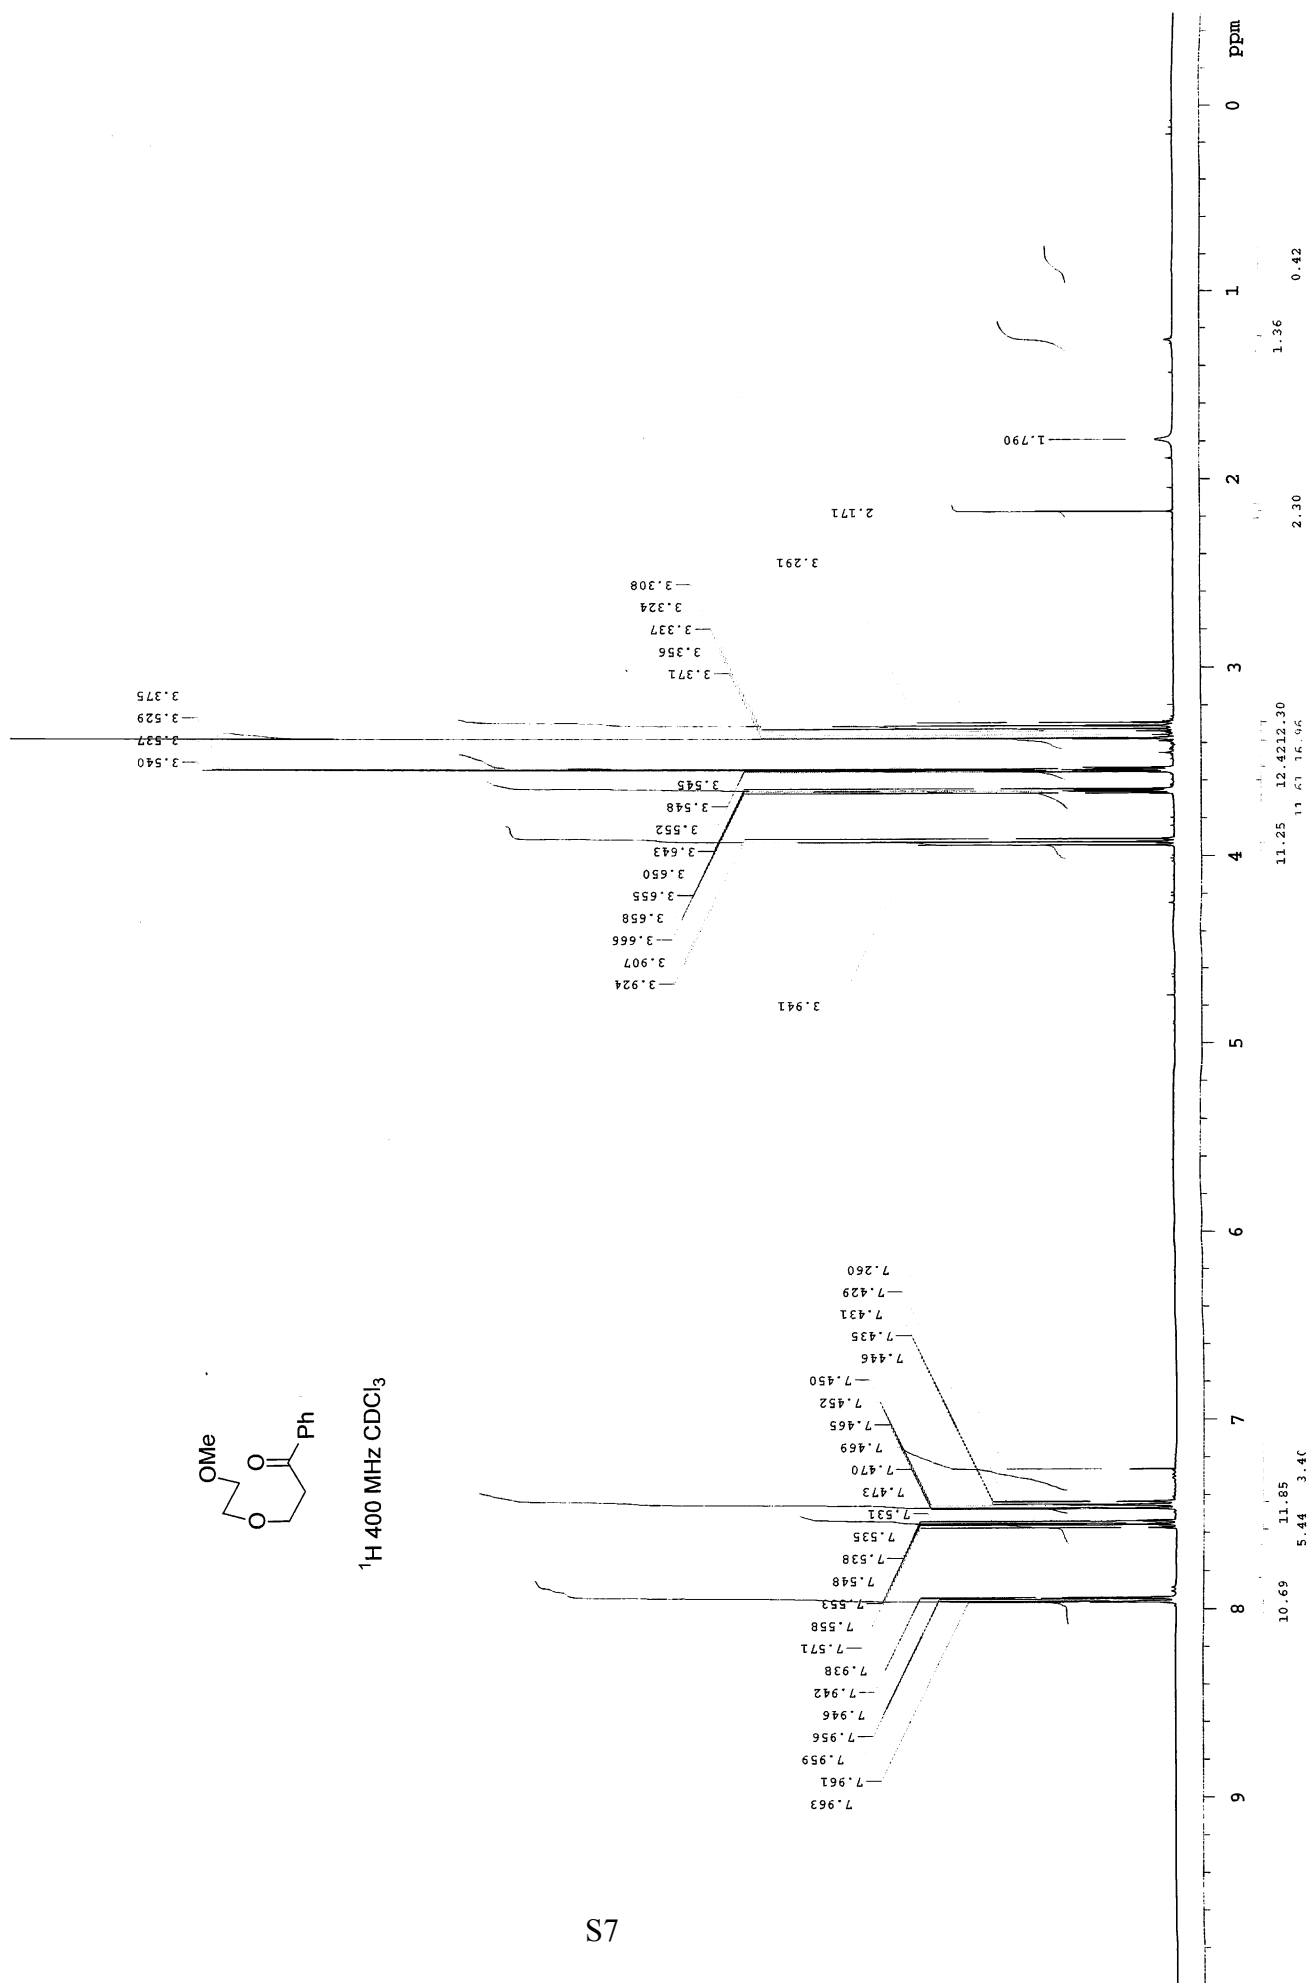

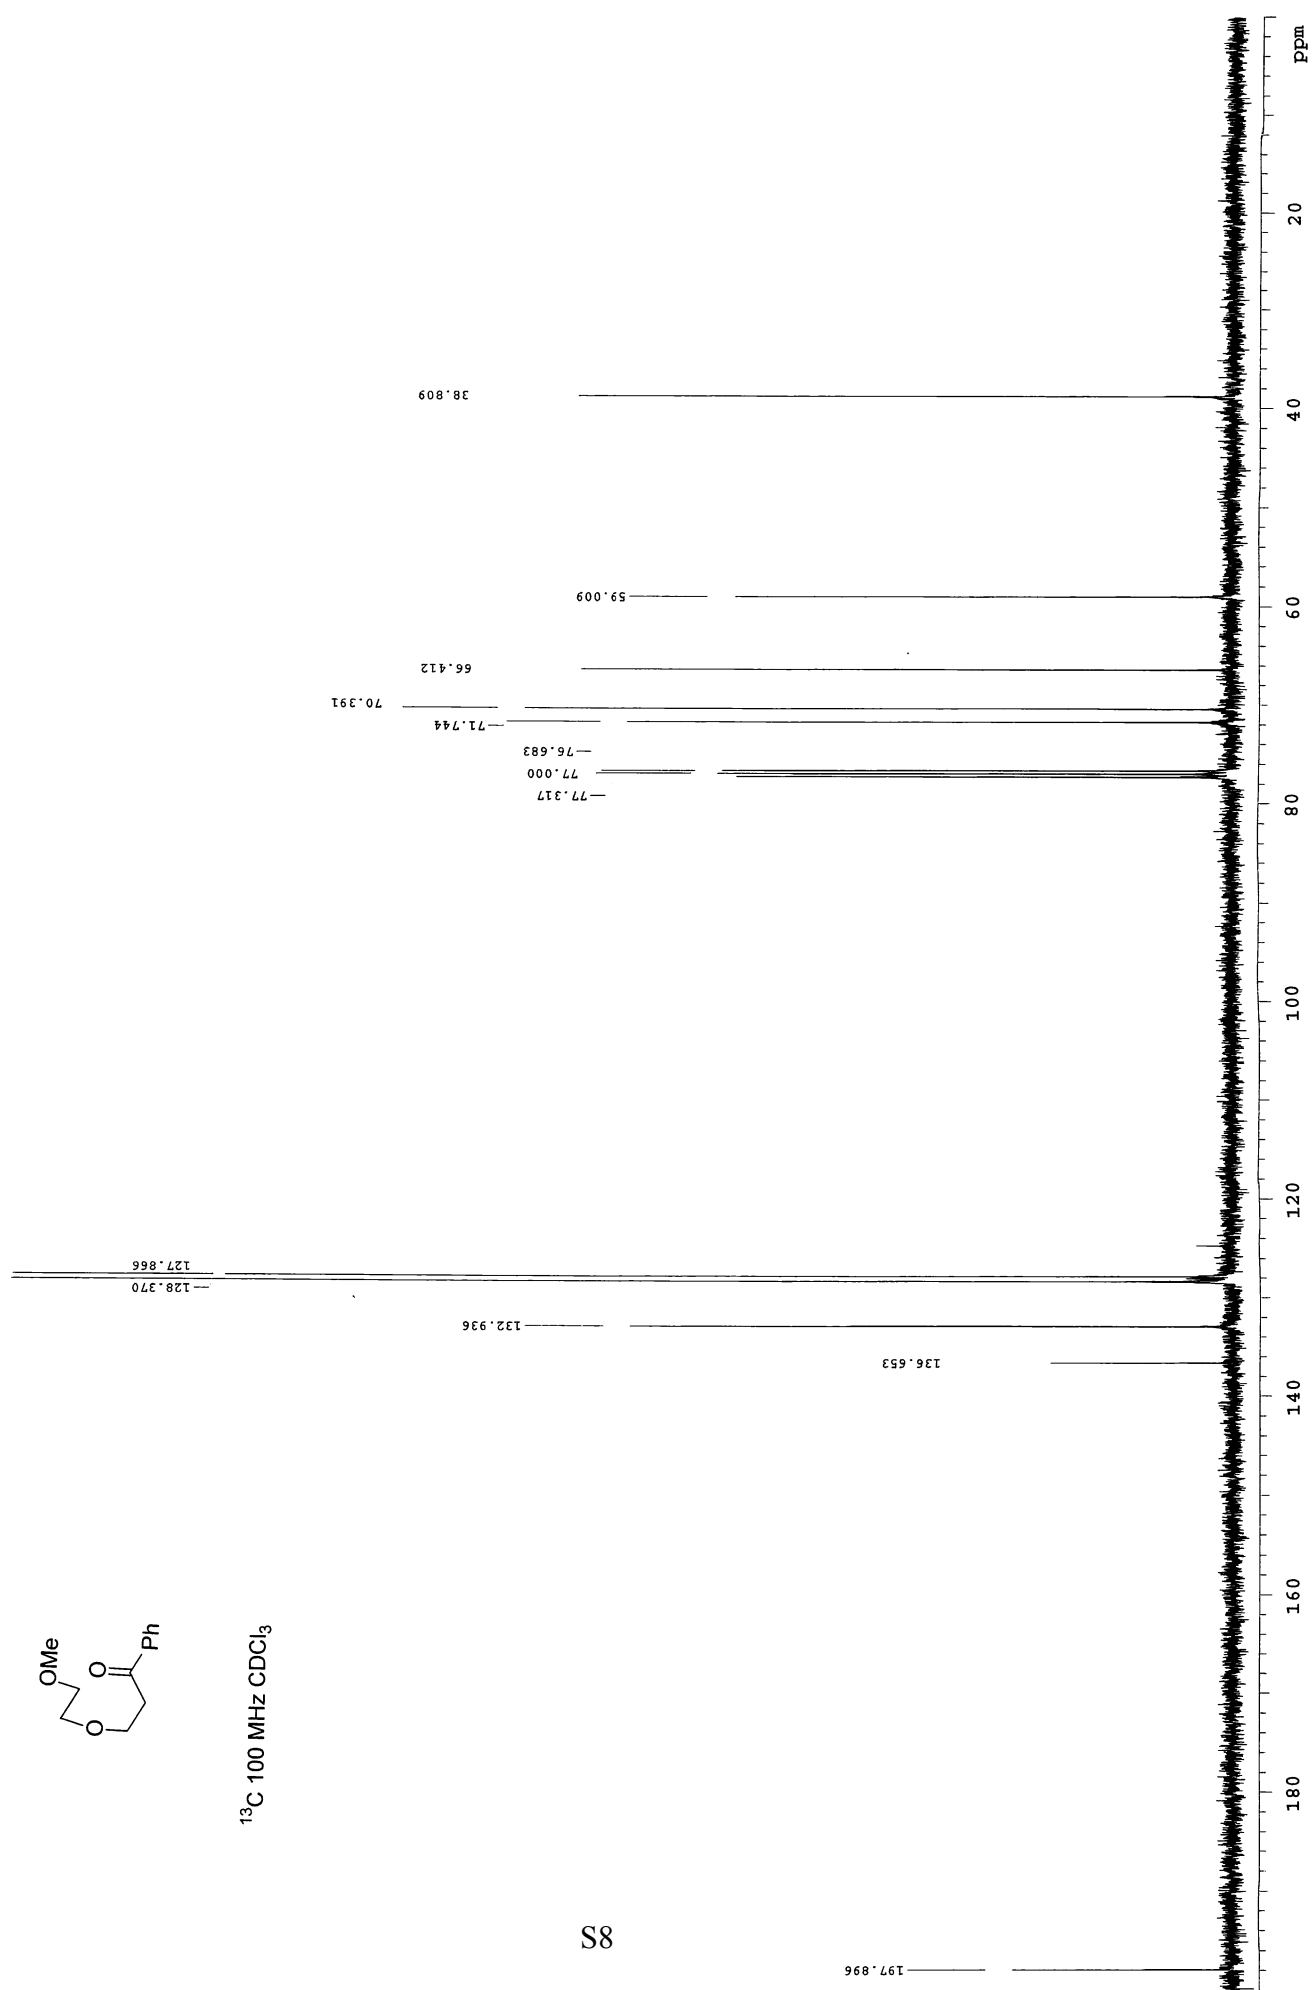



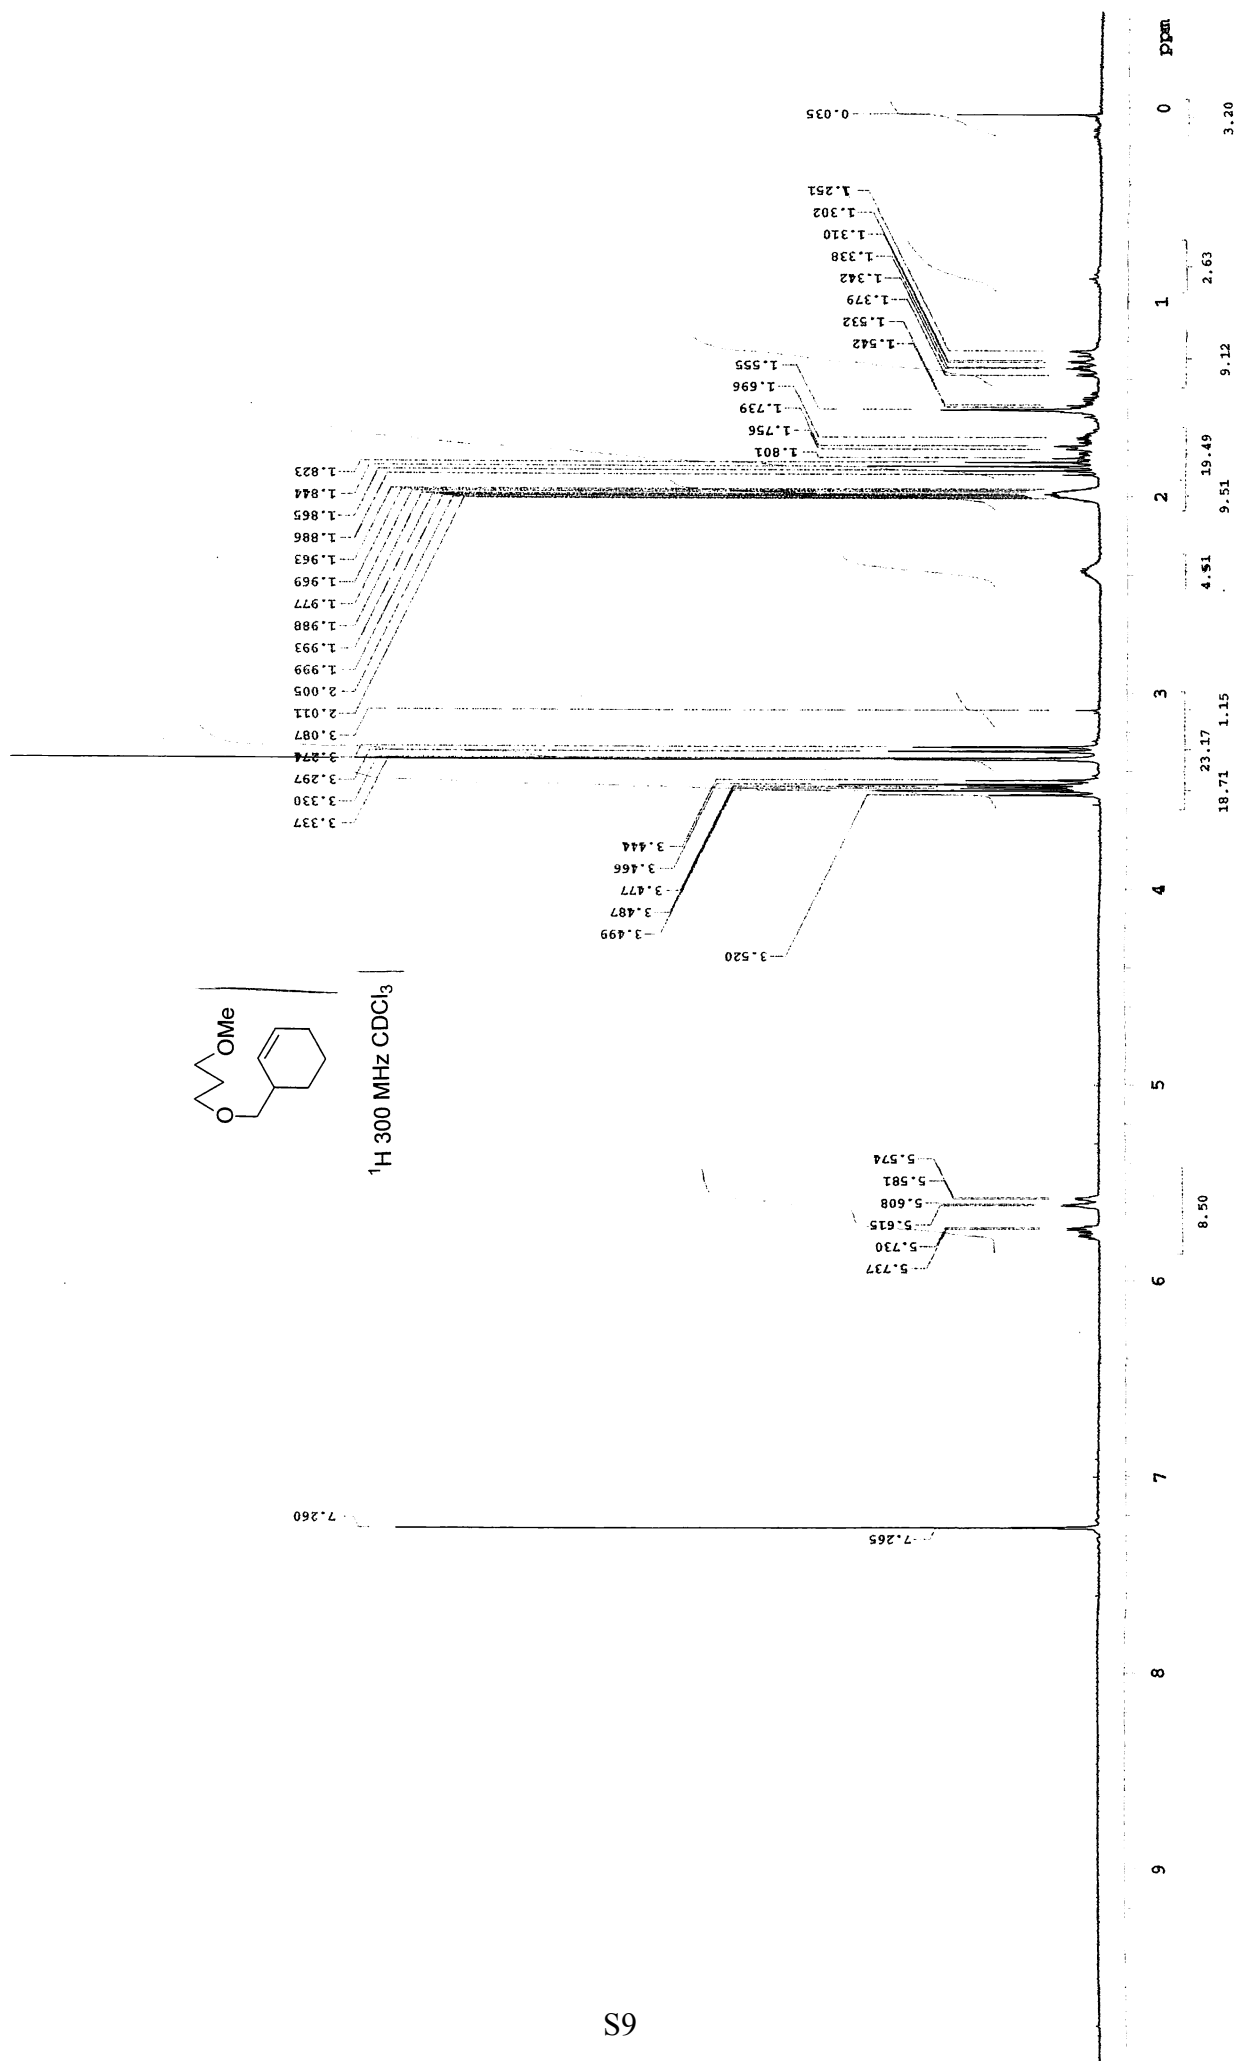

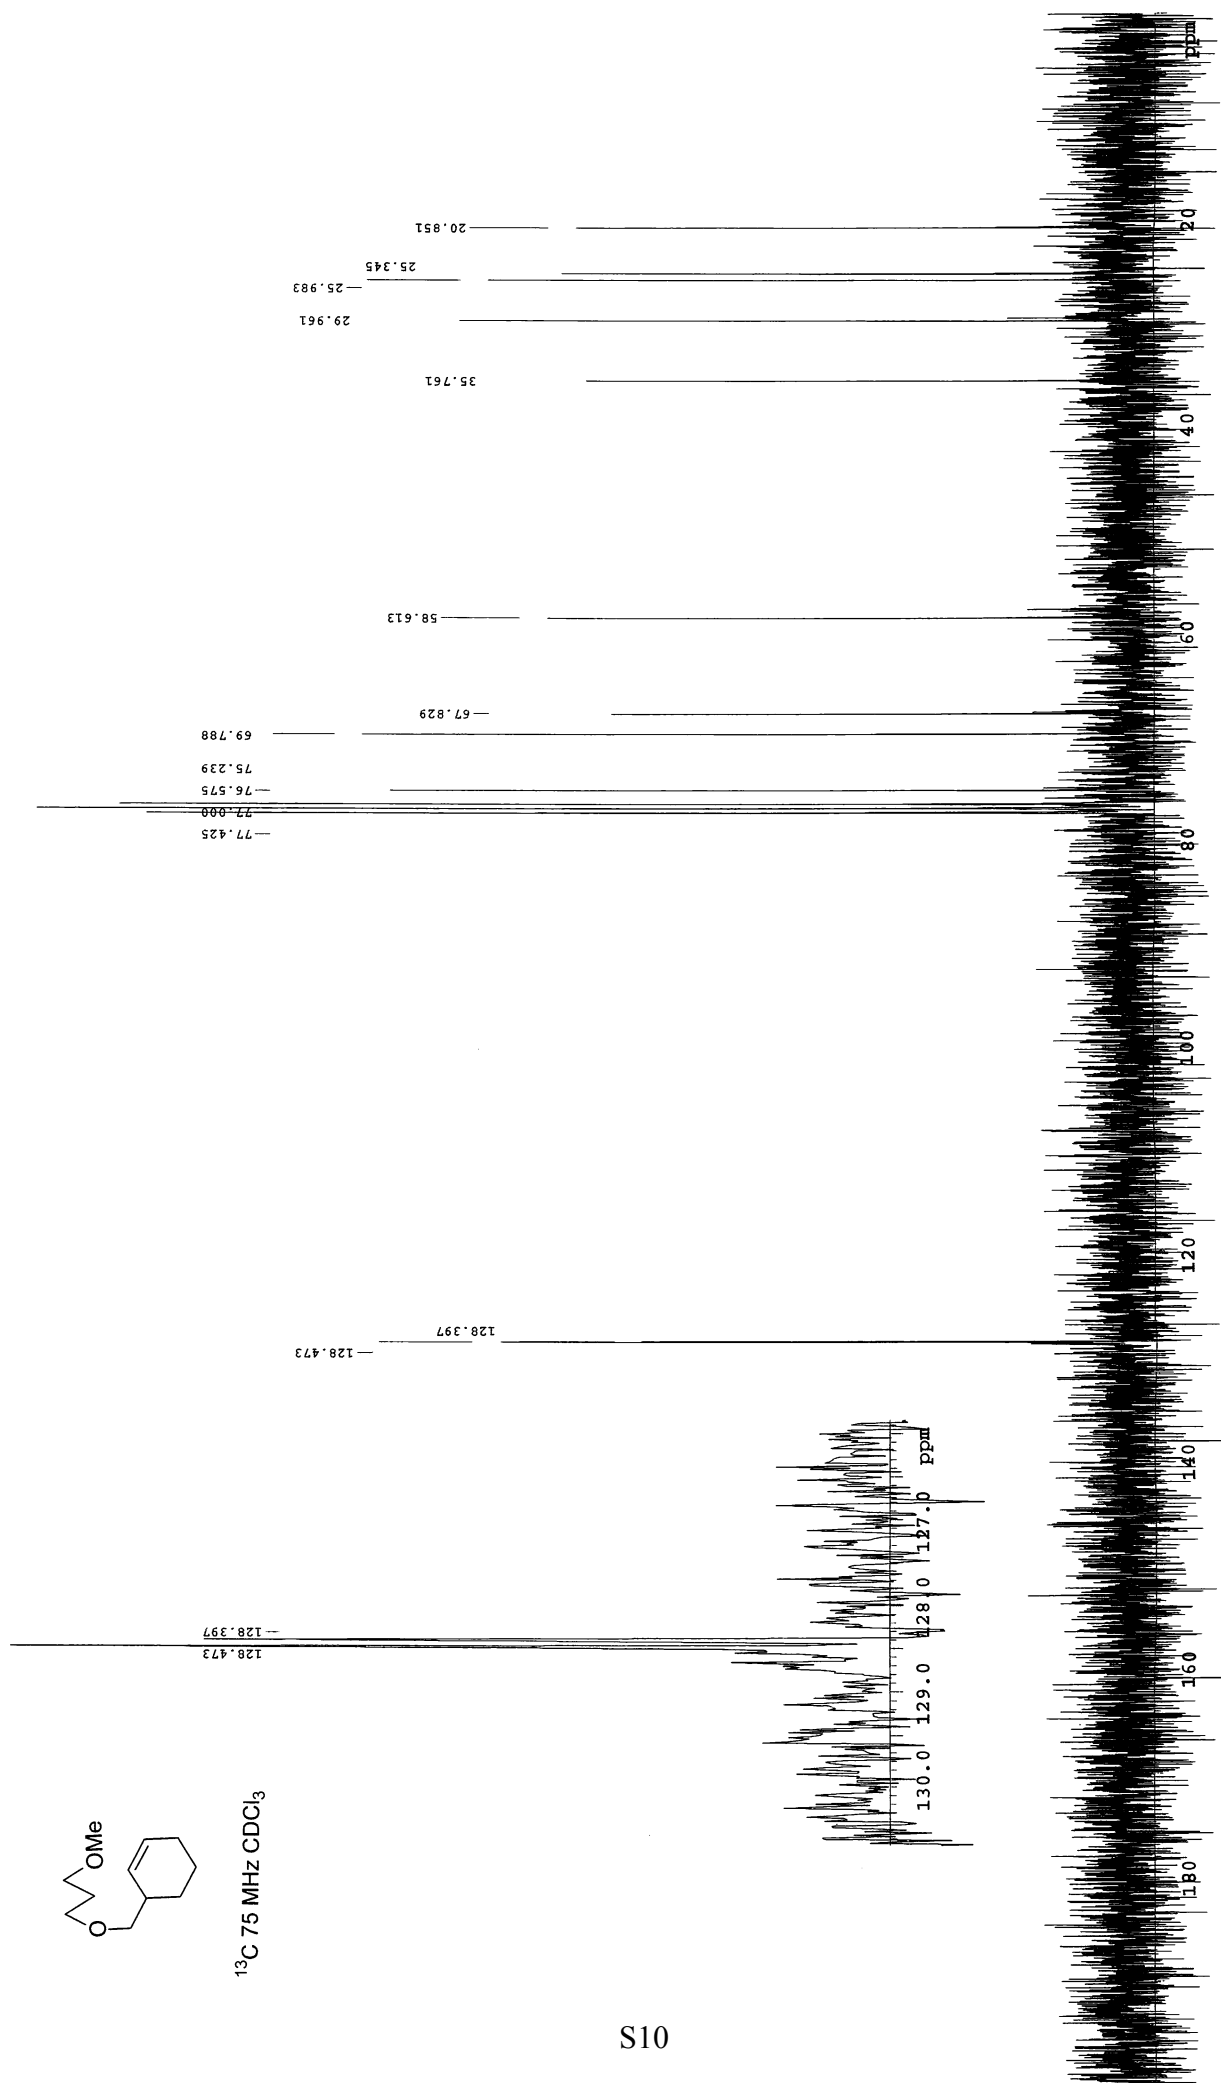

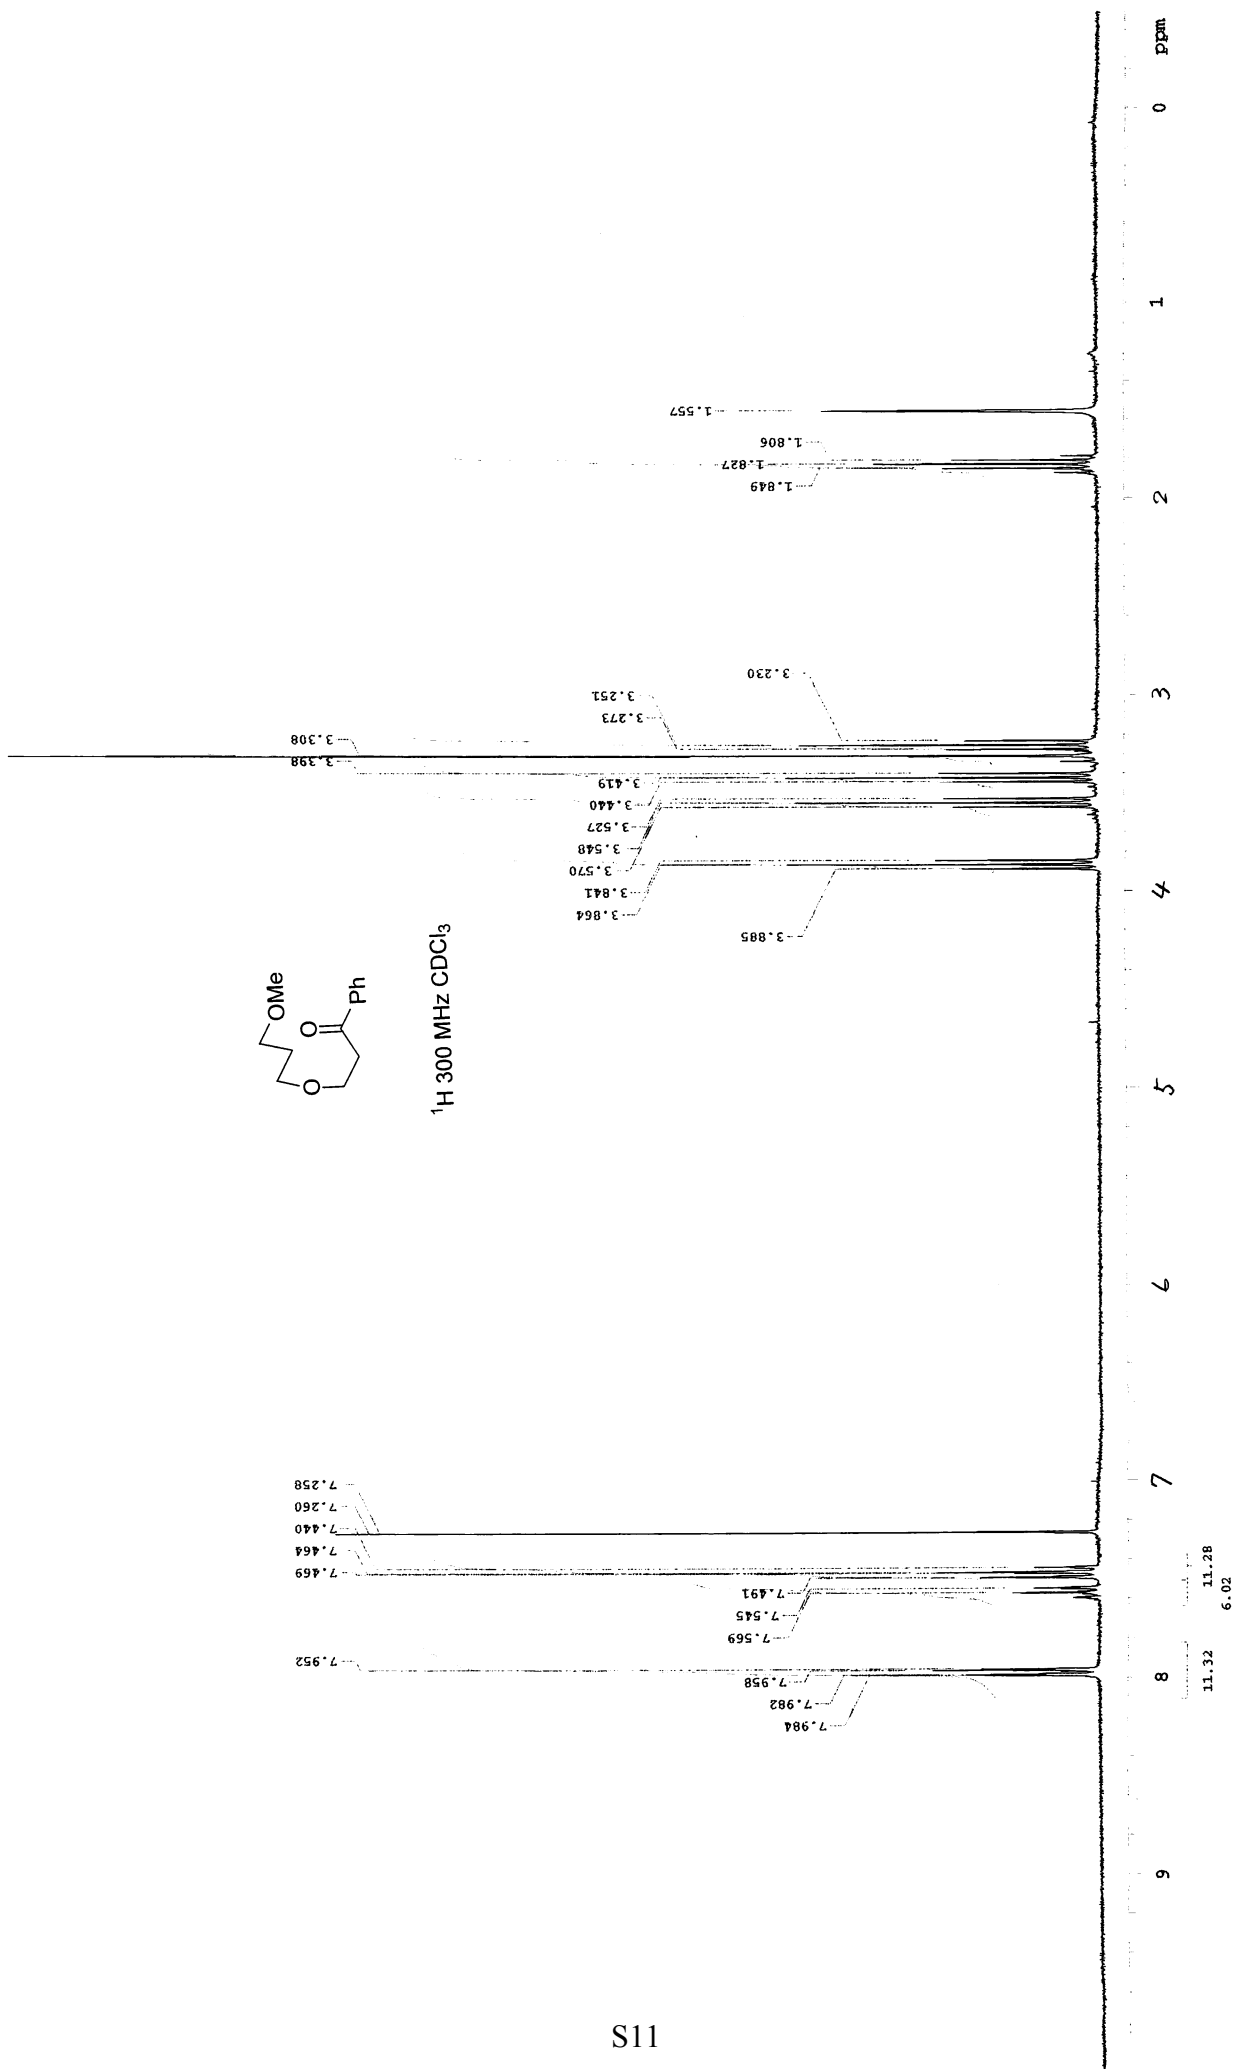

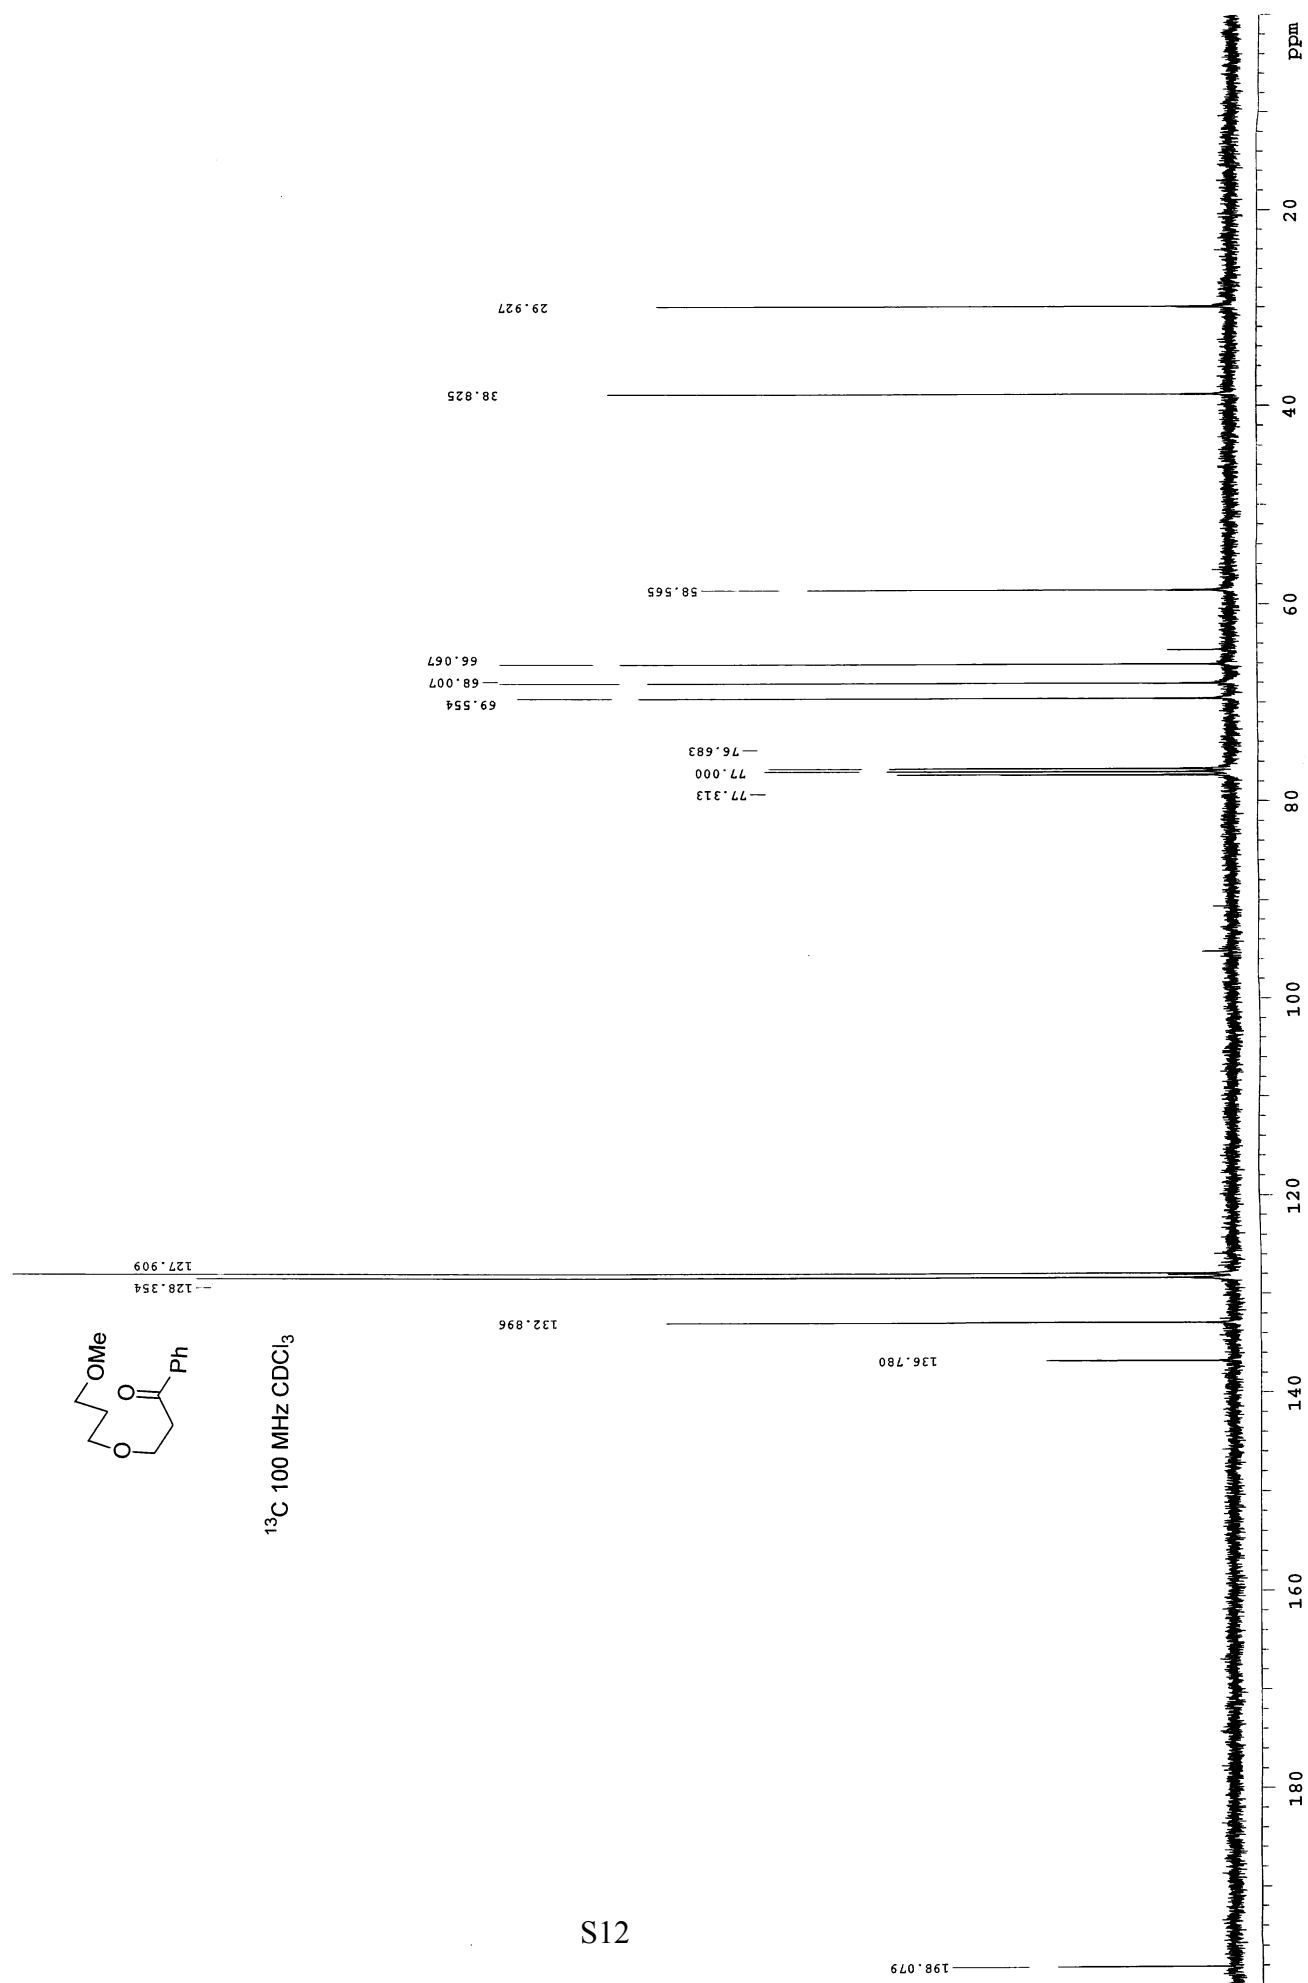

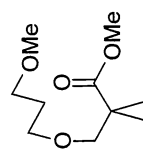

$^1\text{H}$  300 MHz  $\text{CDCl}_3$

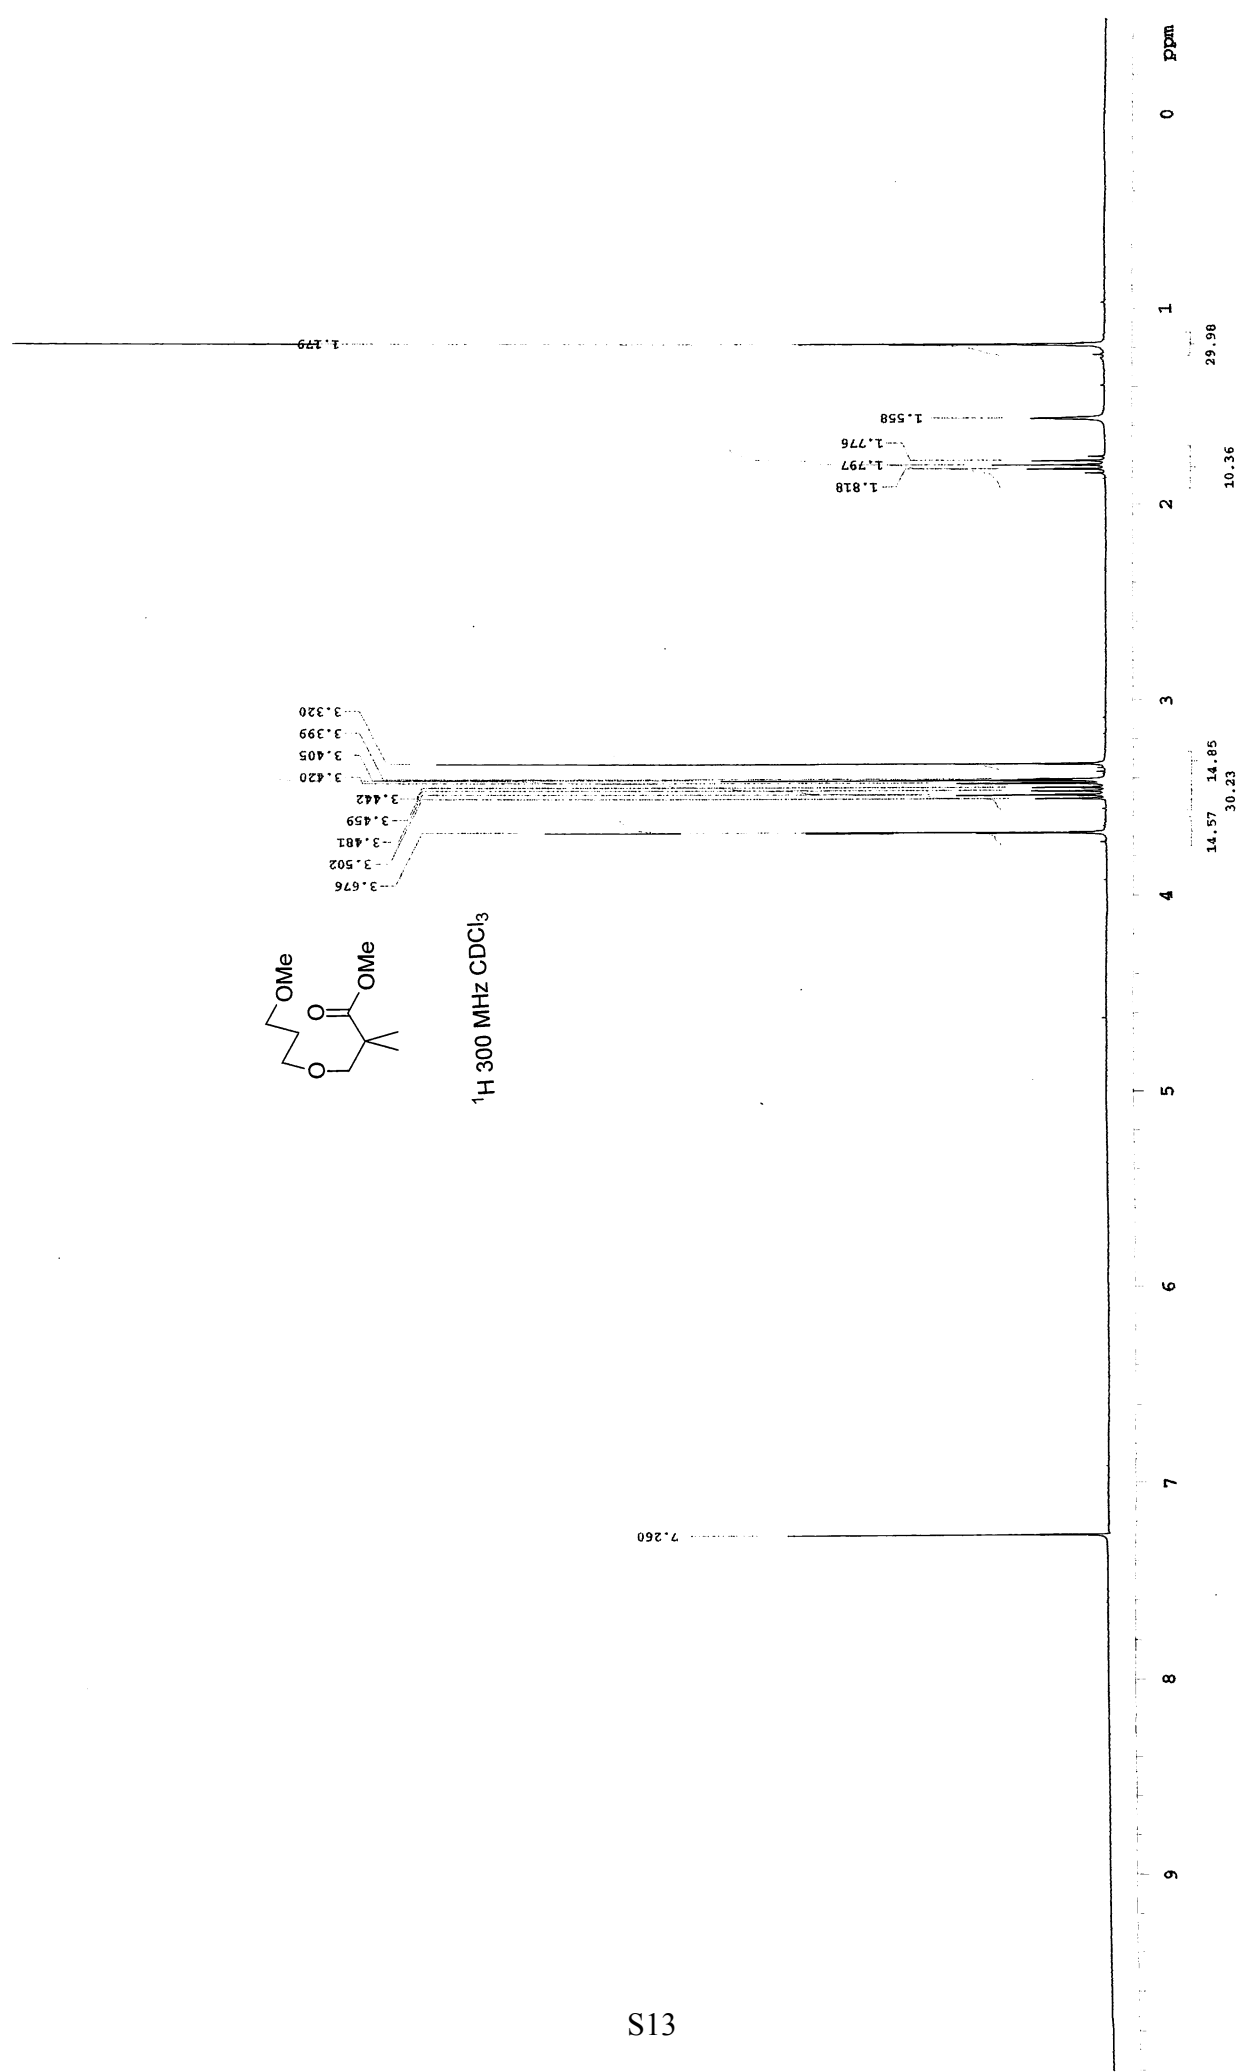

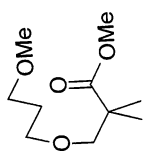

$^{13}\text{C}$  100 MHz  $\text{CDCl}_3$

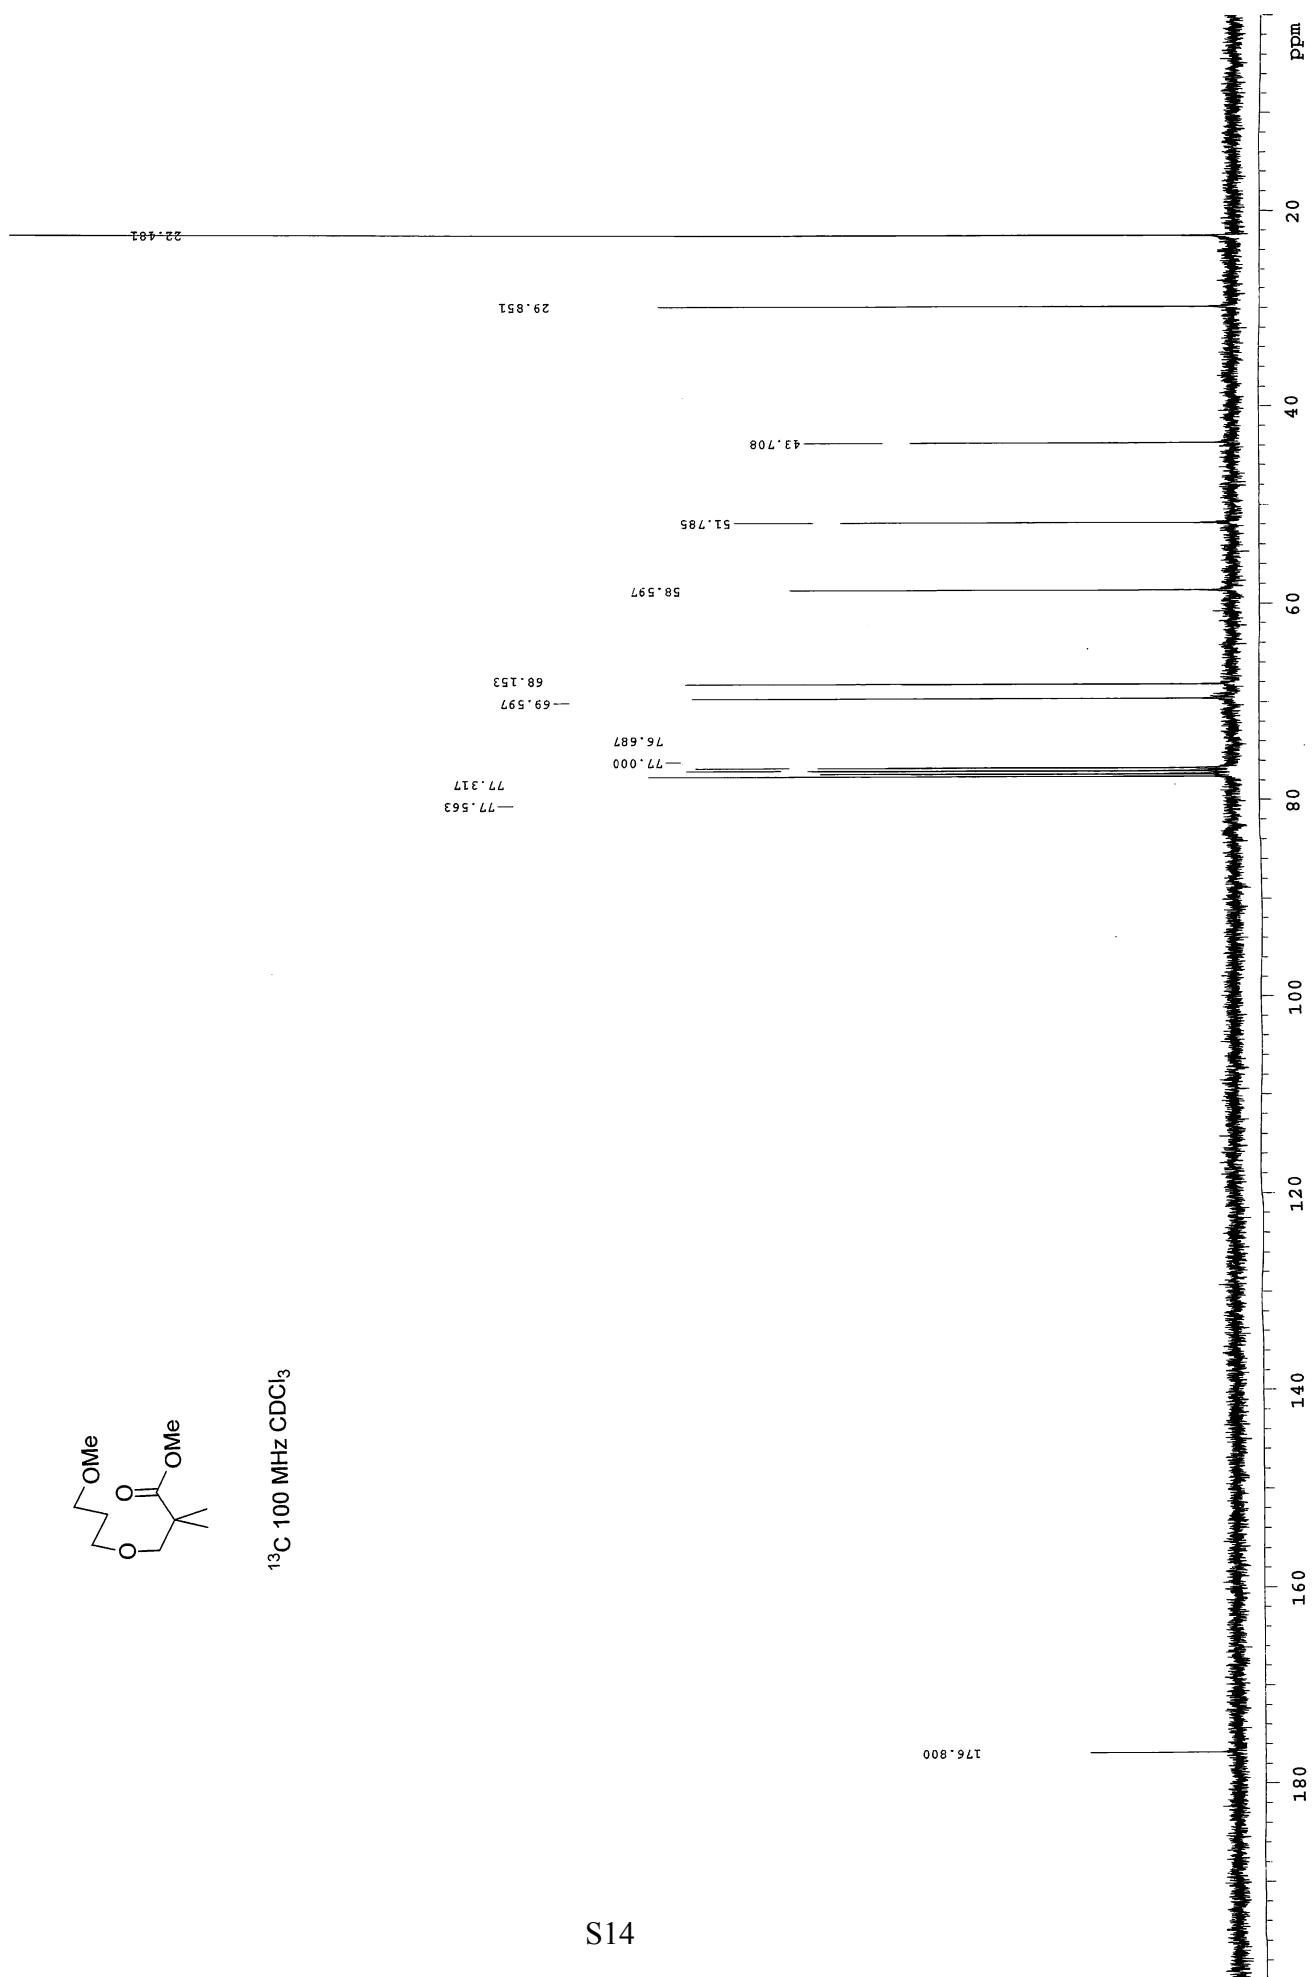

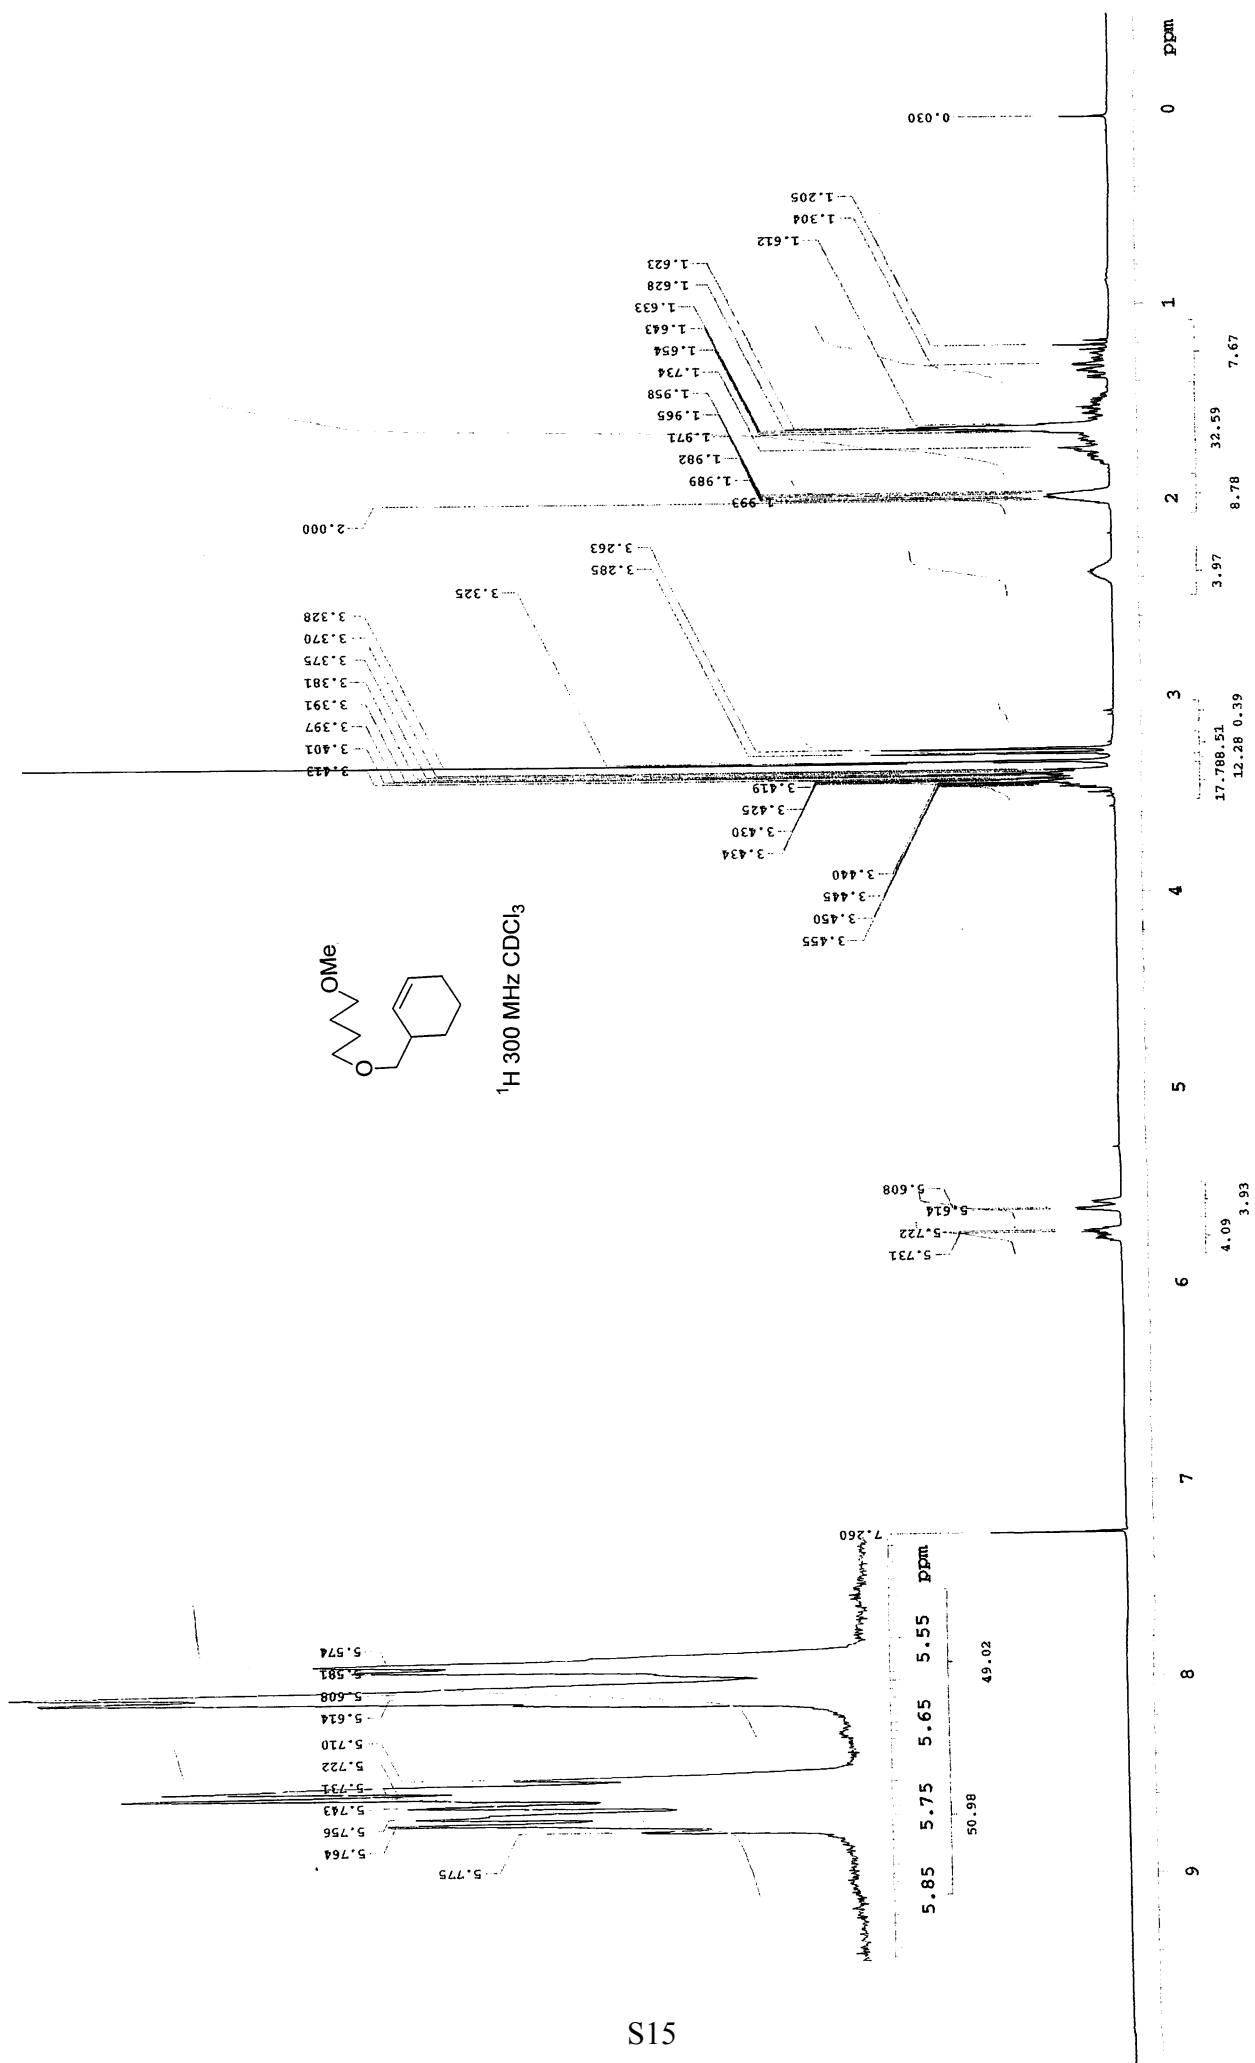

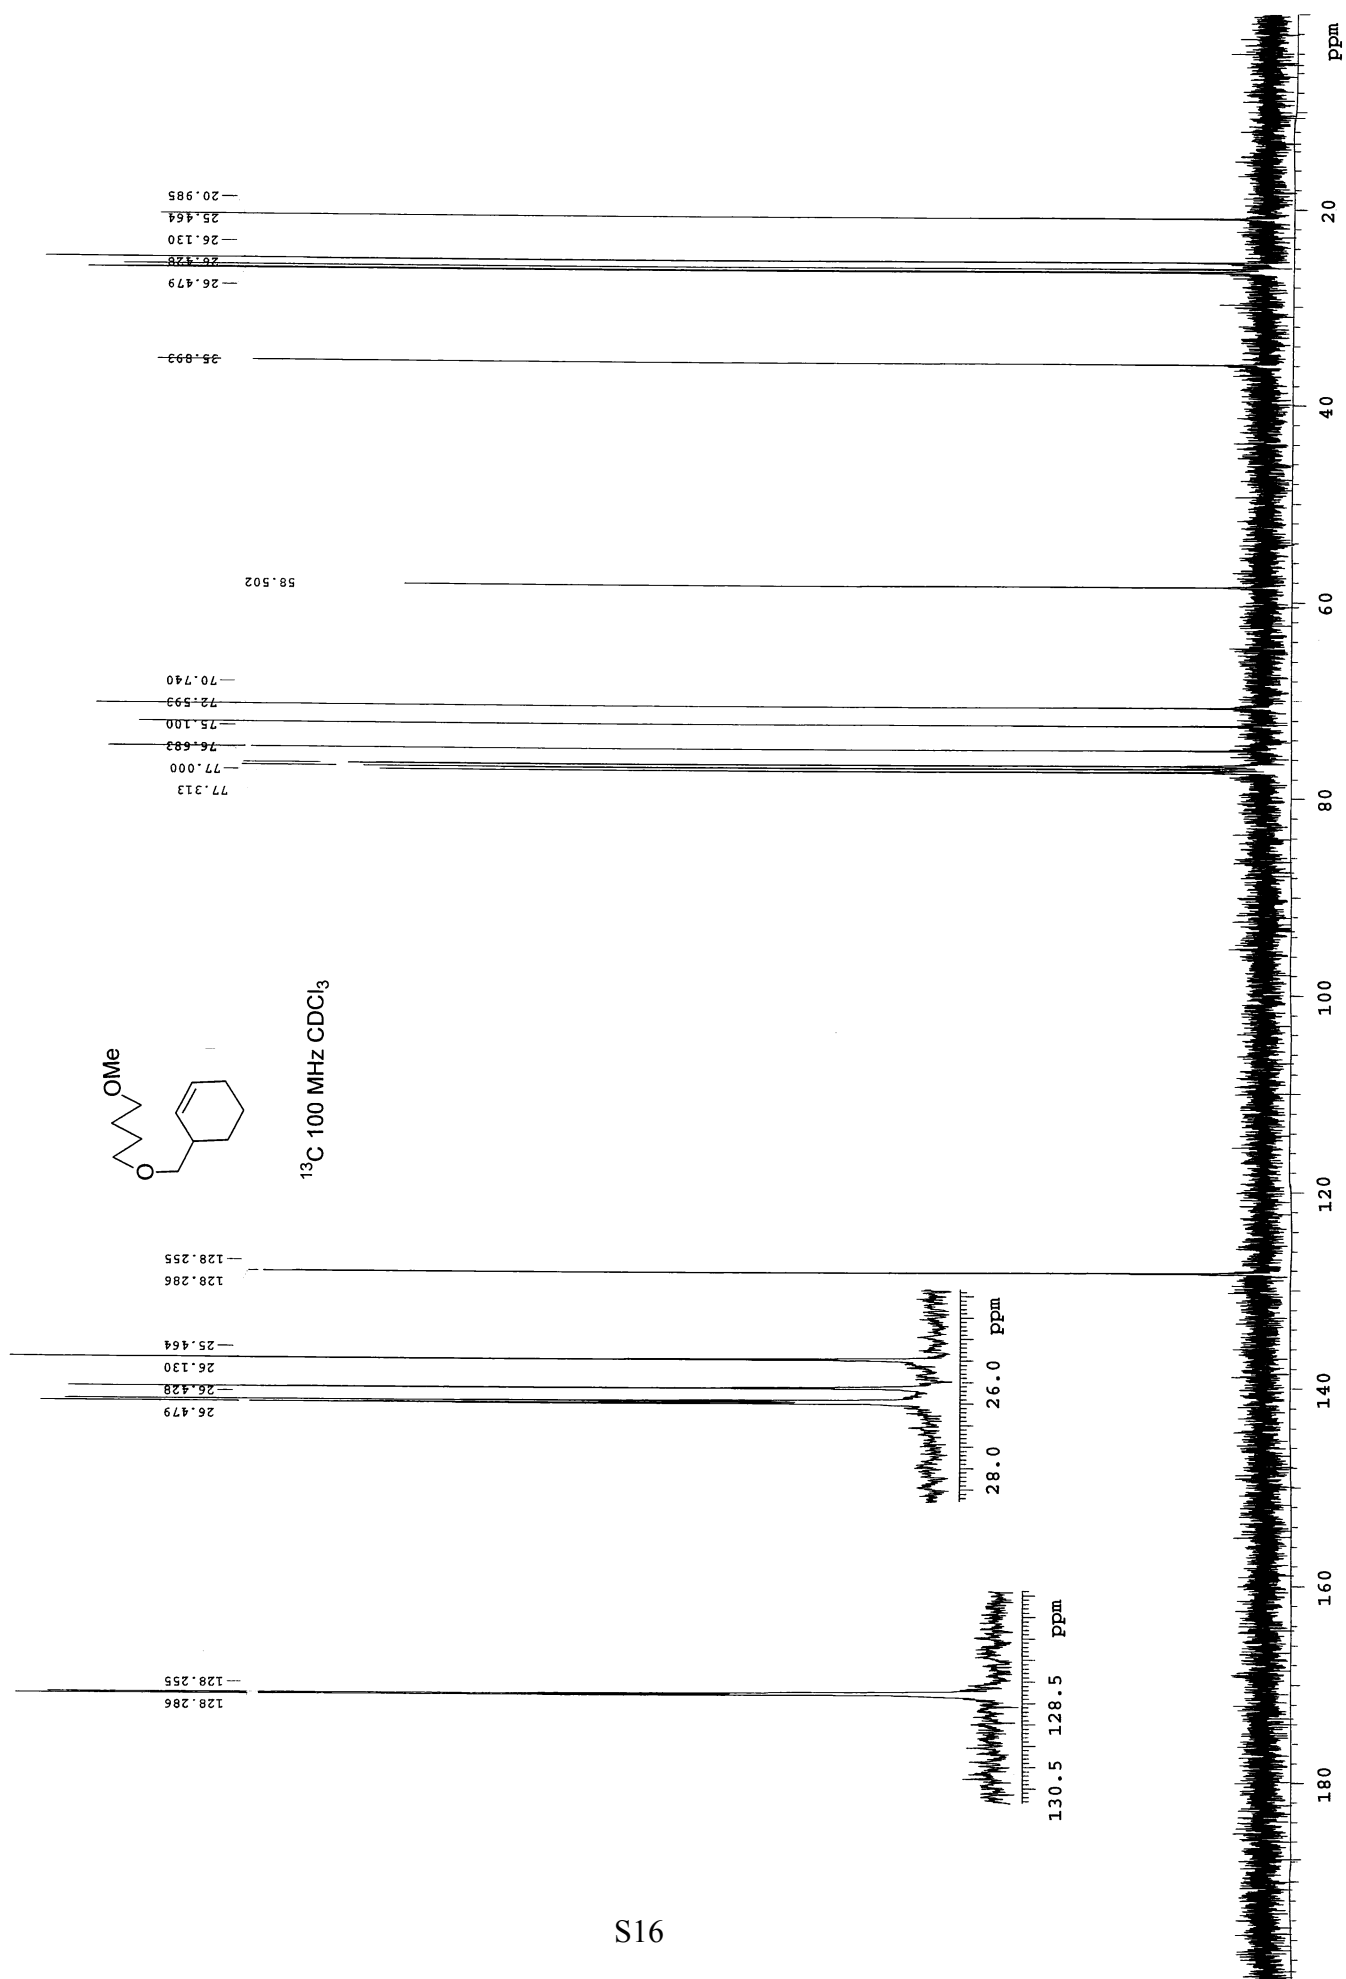



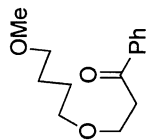

$^1\text{H}$  400 MHz  $\text{CDCl}_3$

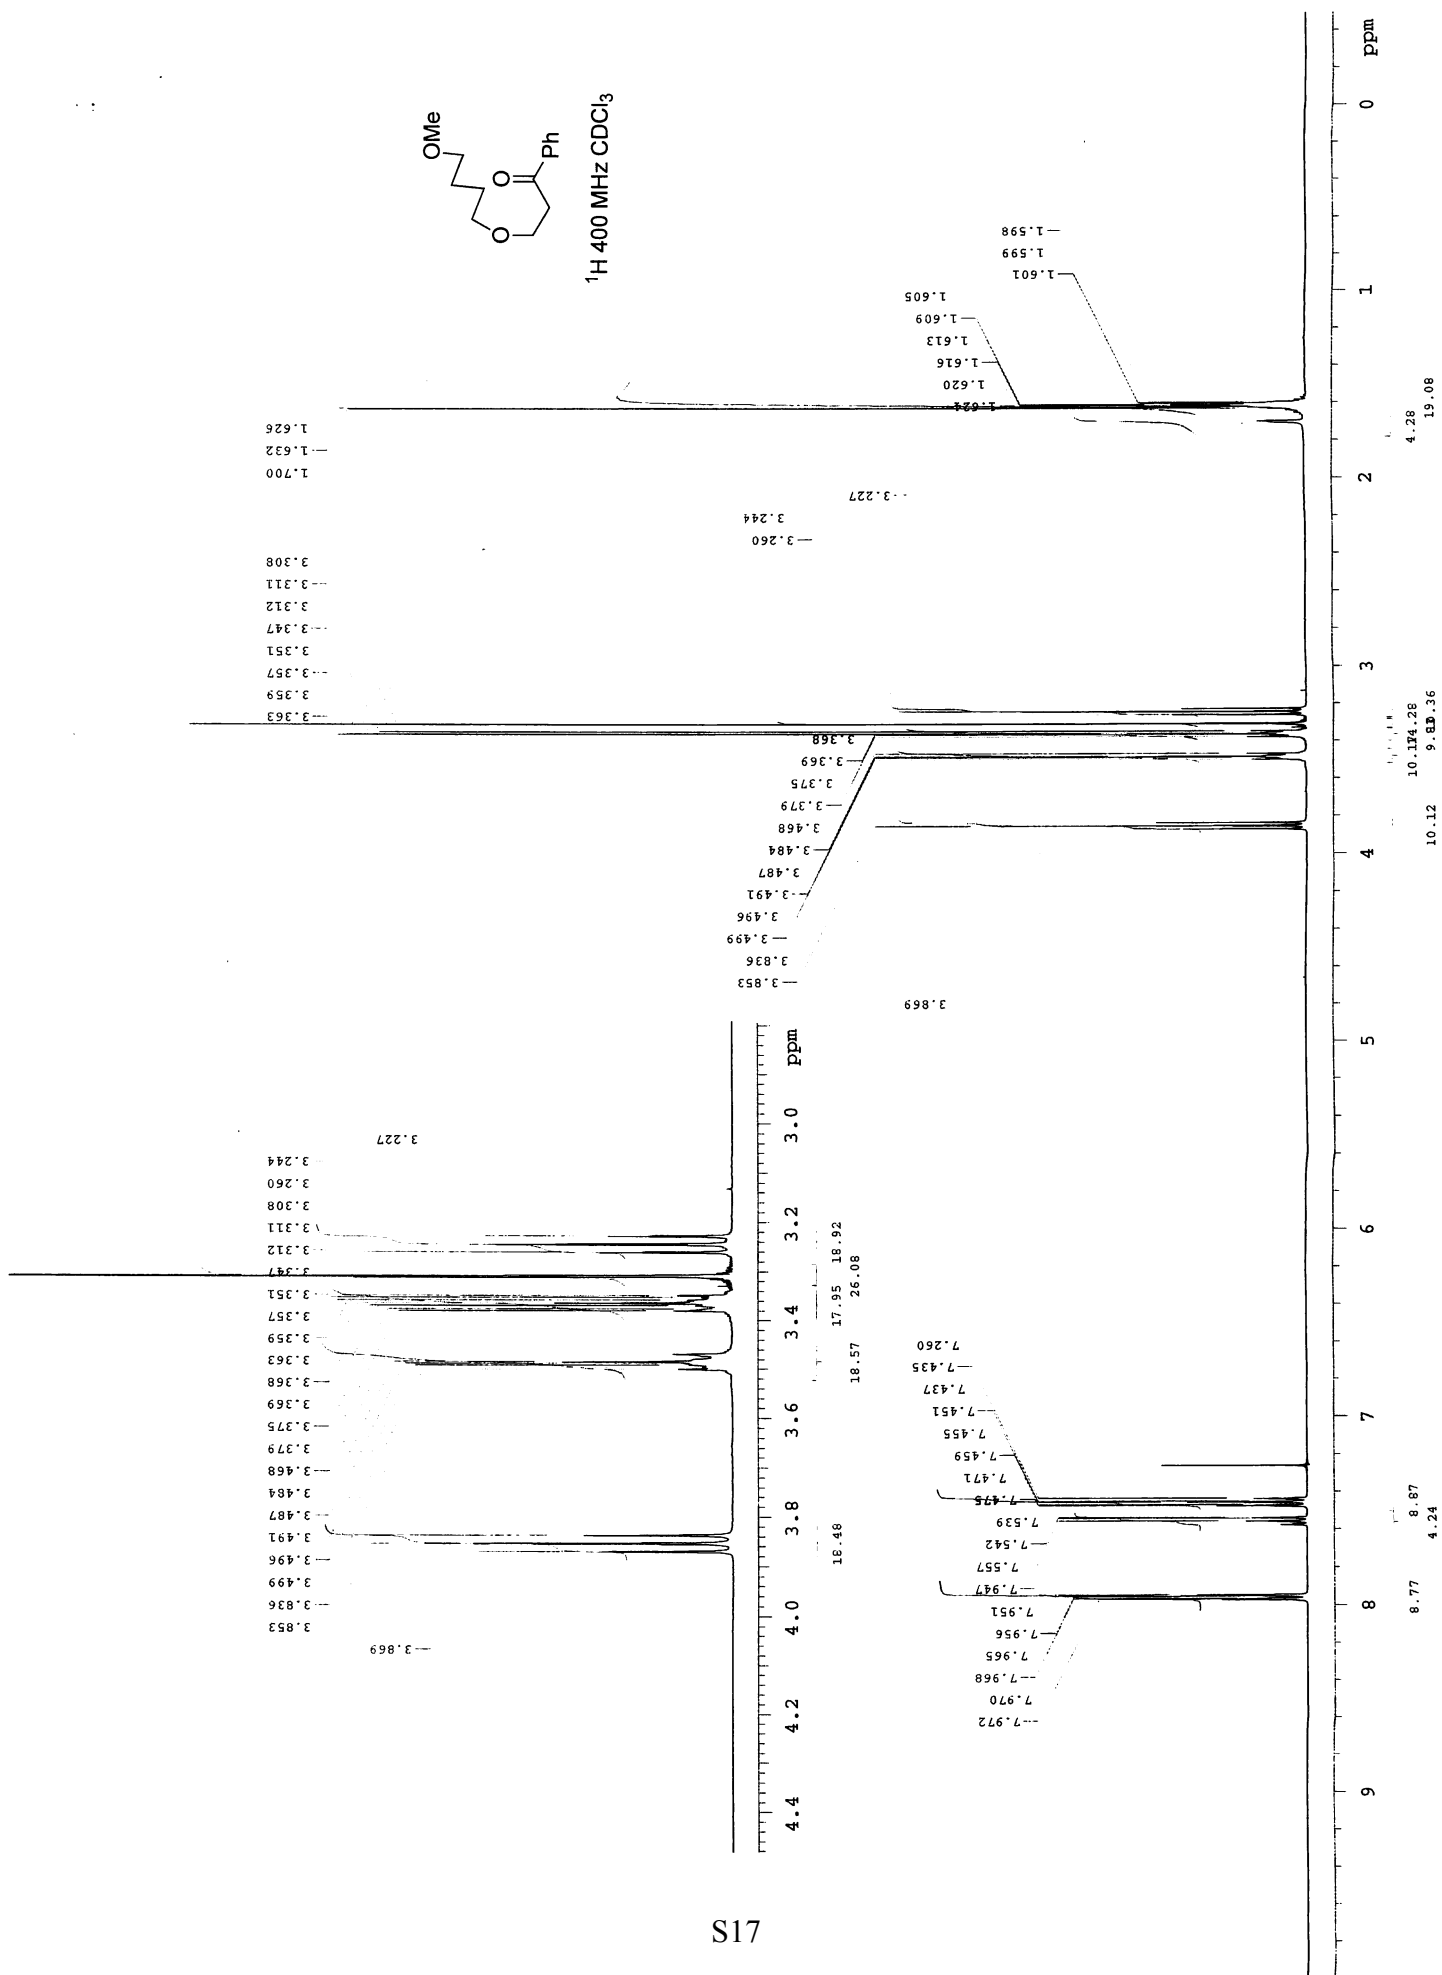

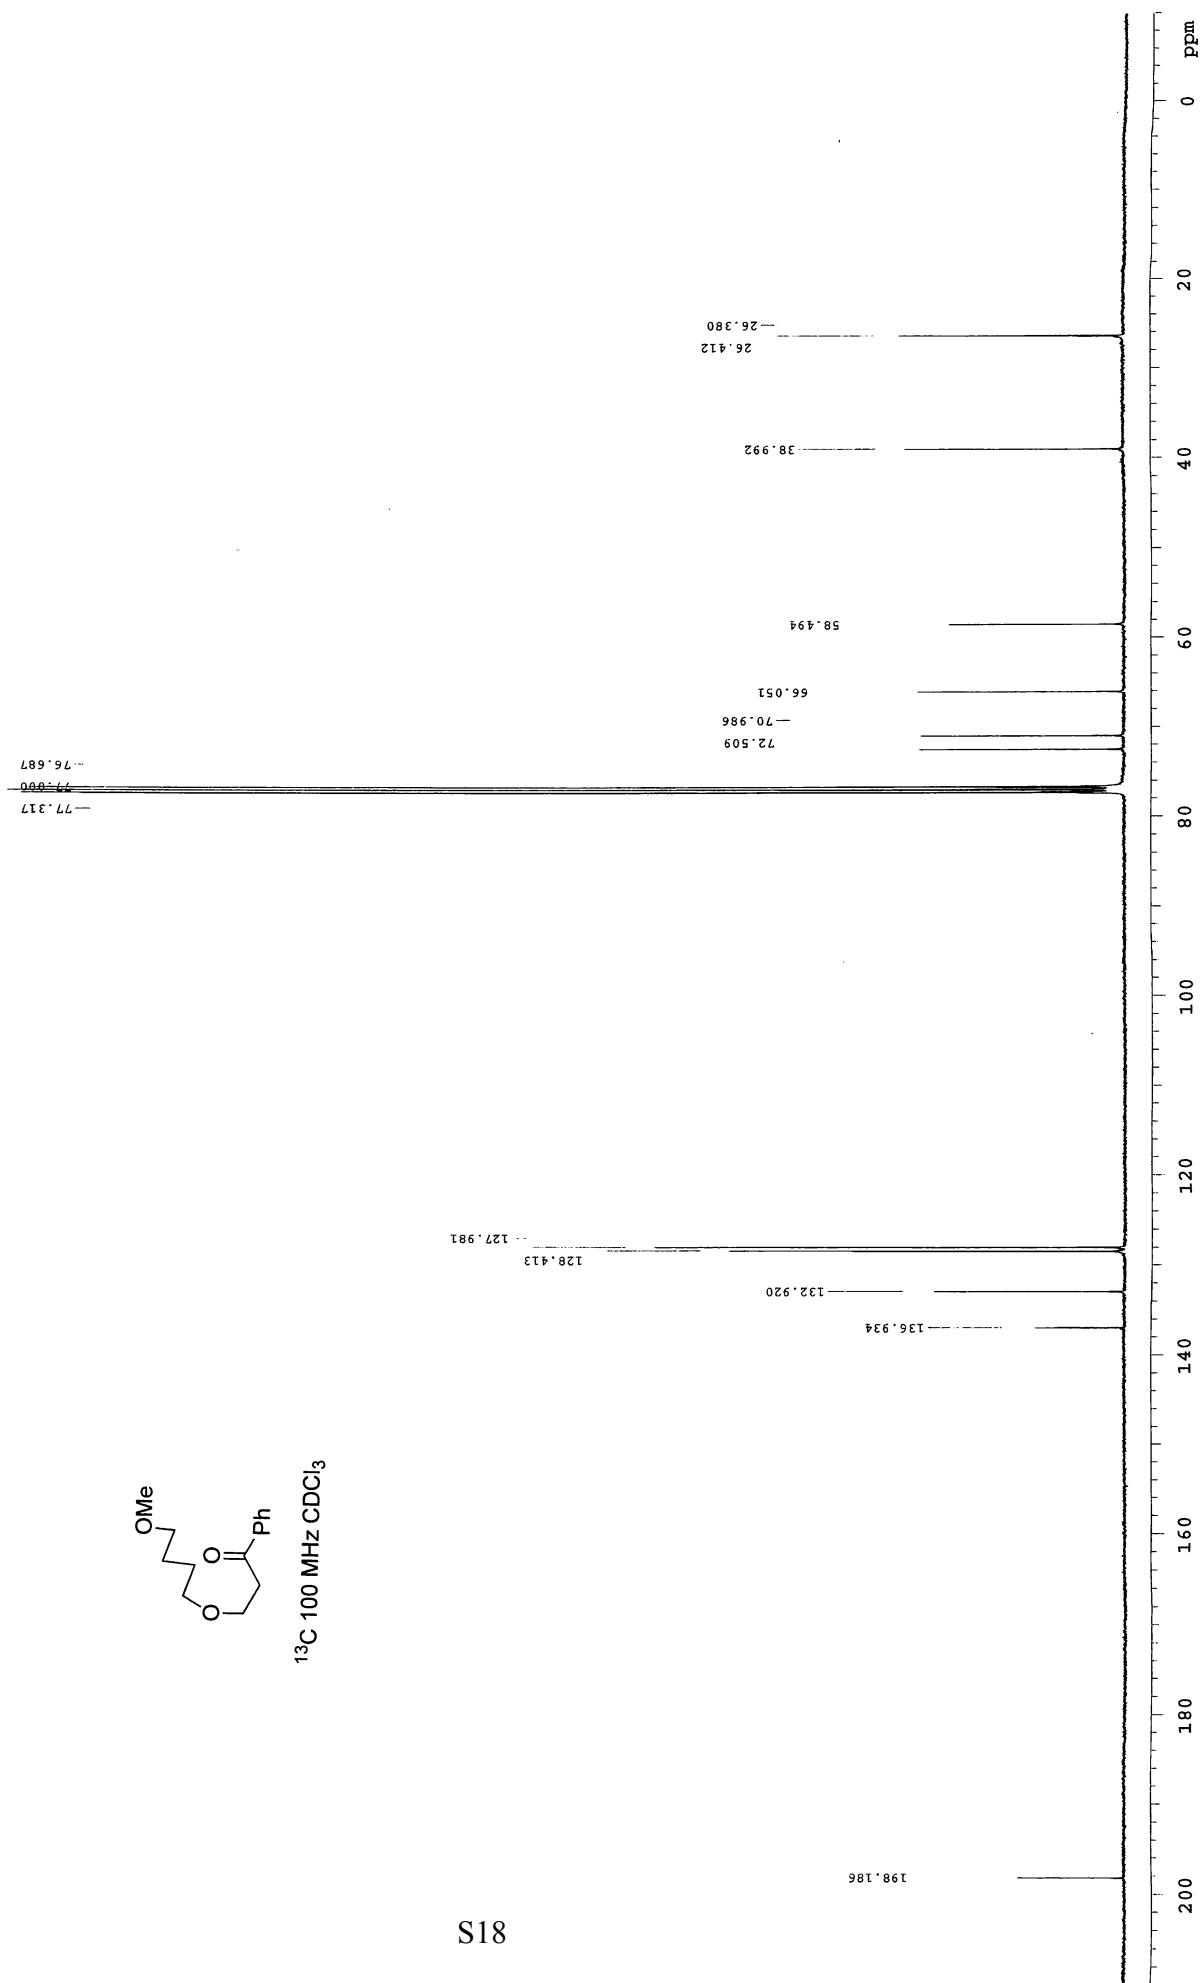

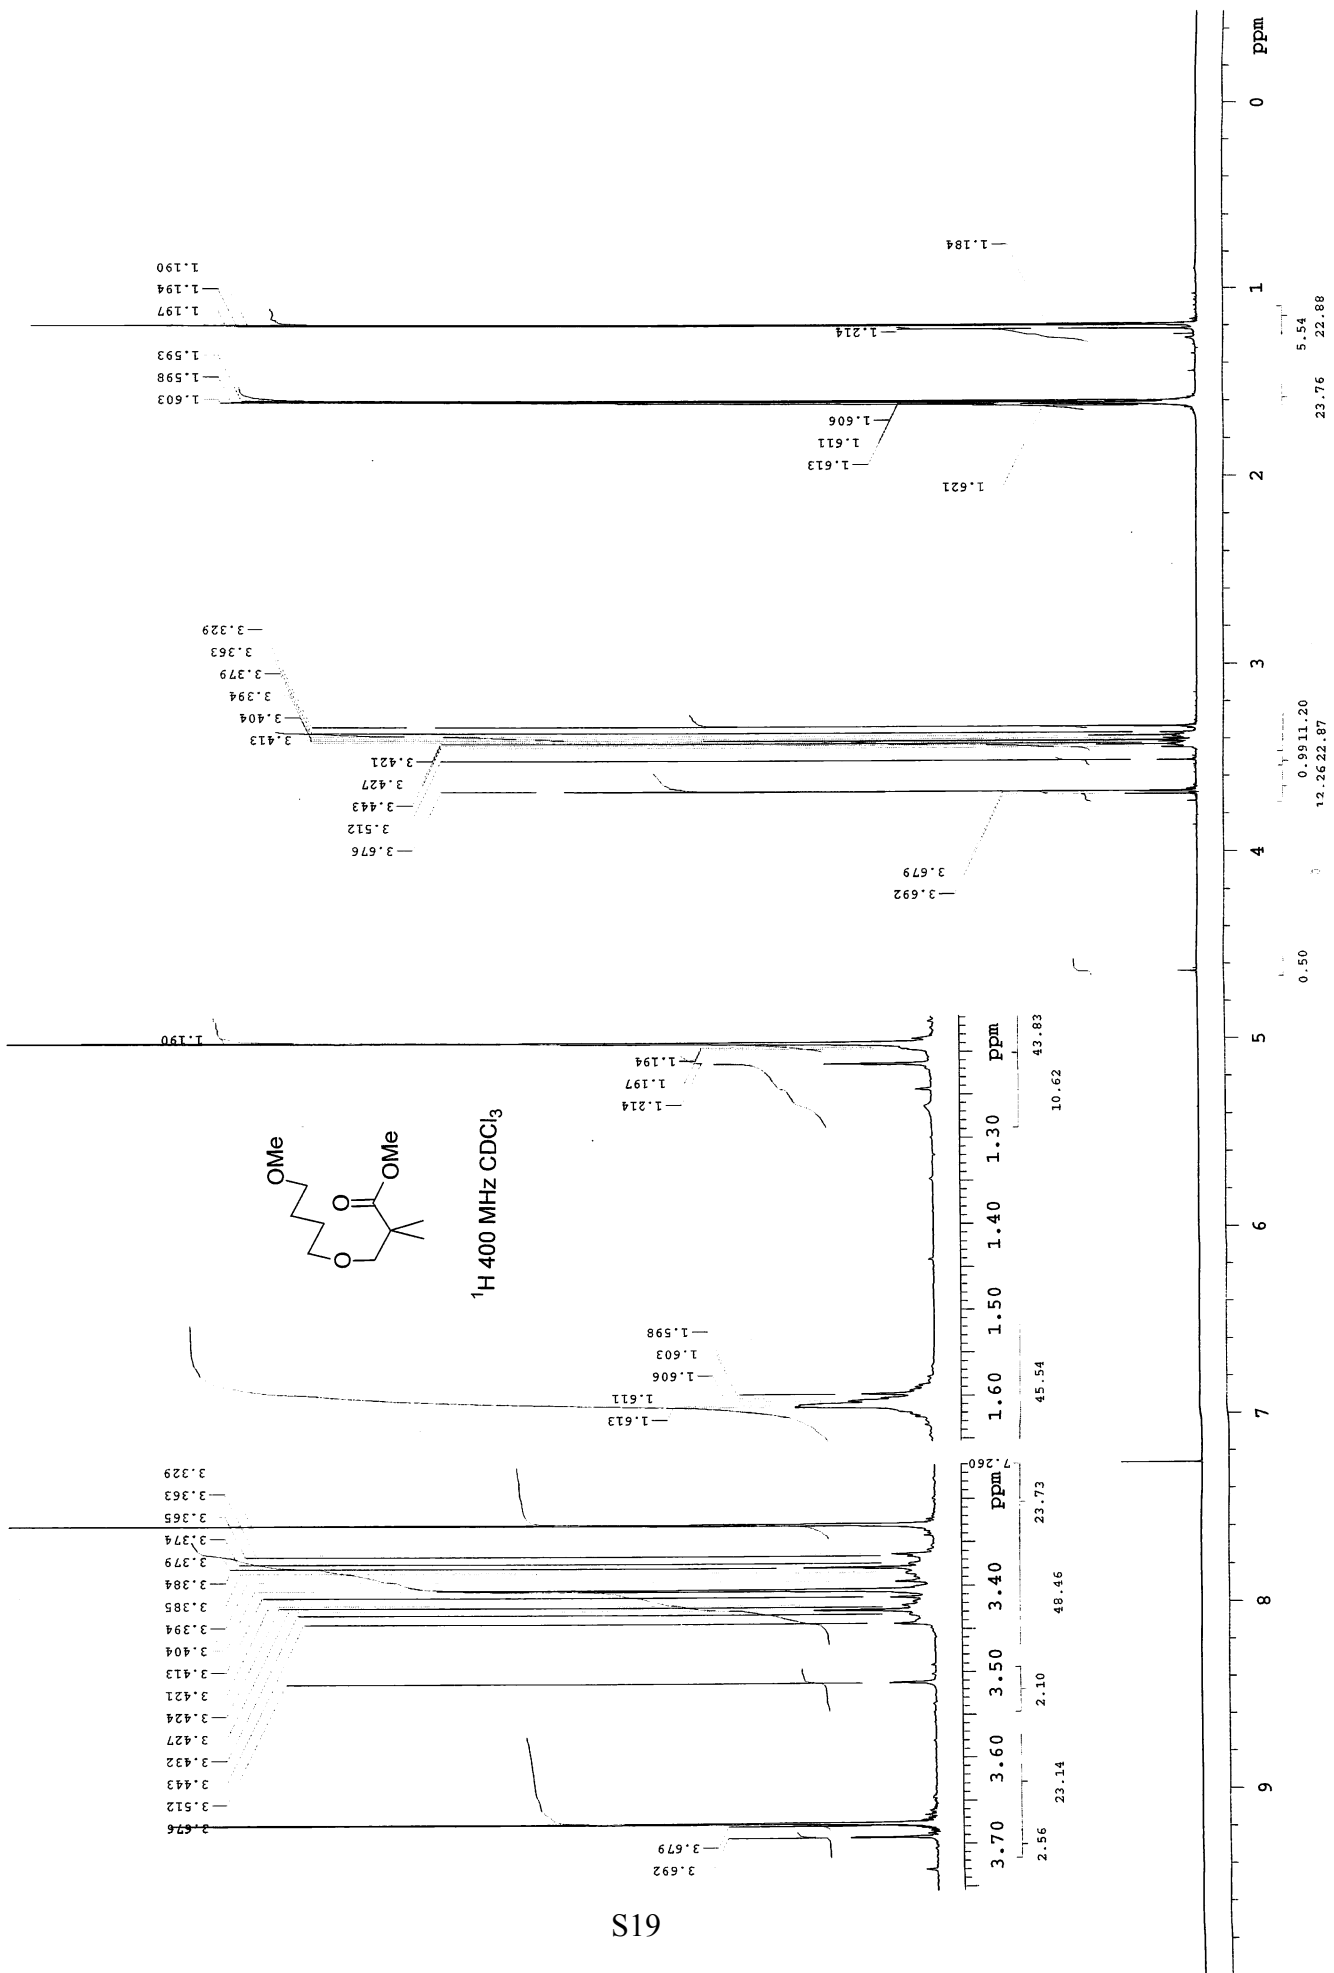

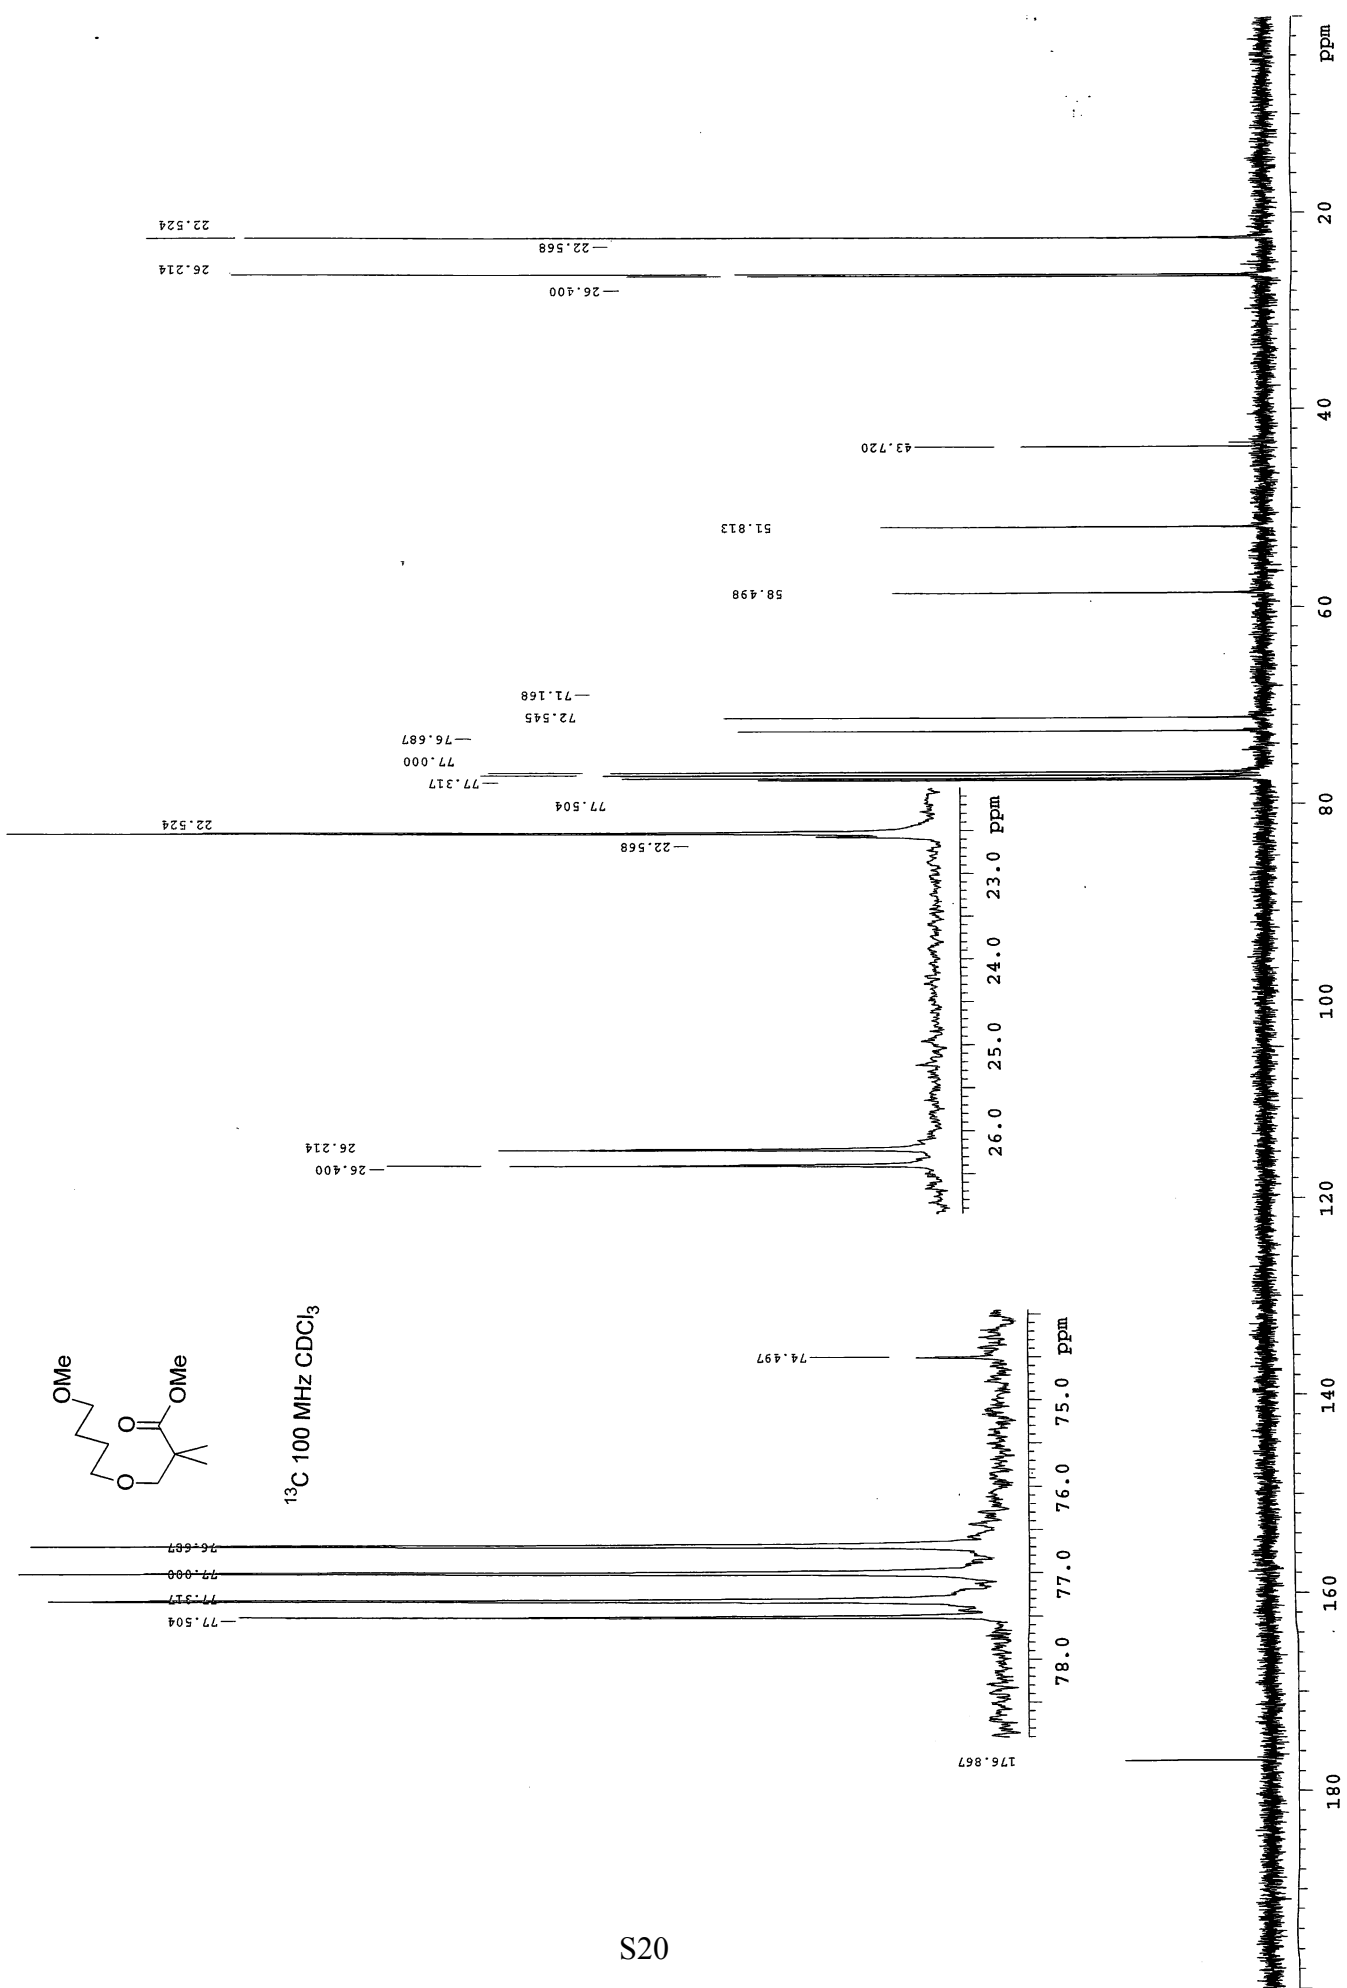

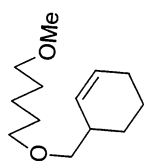

<sup>1</sup>H 300 MHz CDCl<sub>3</sub>

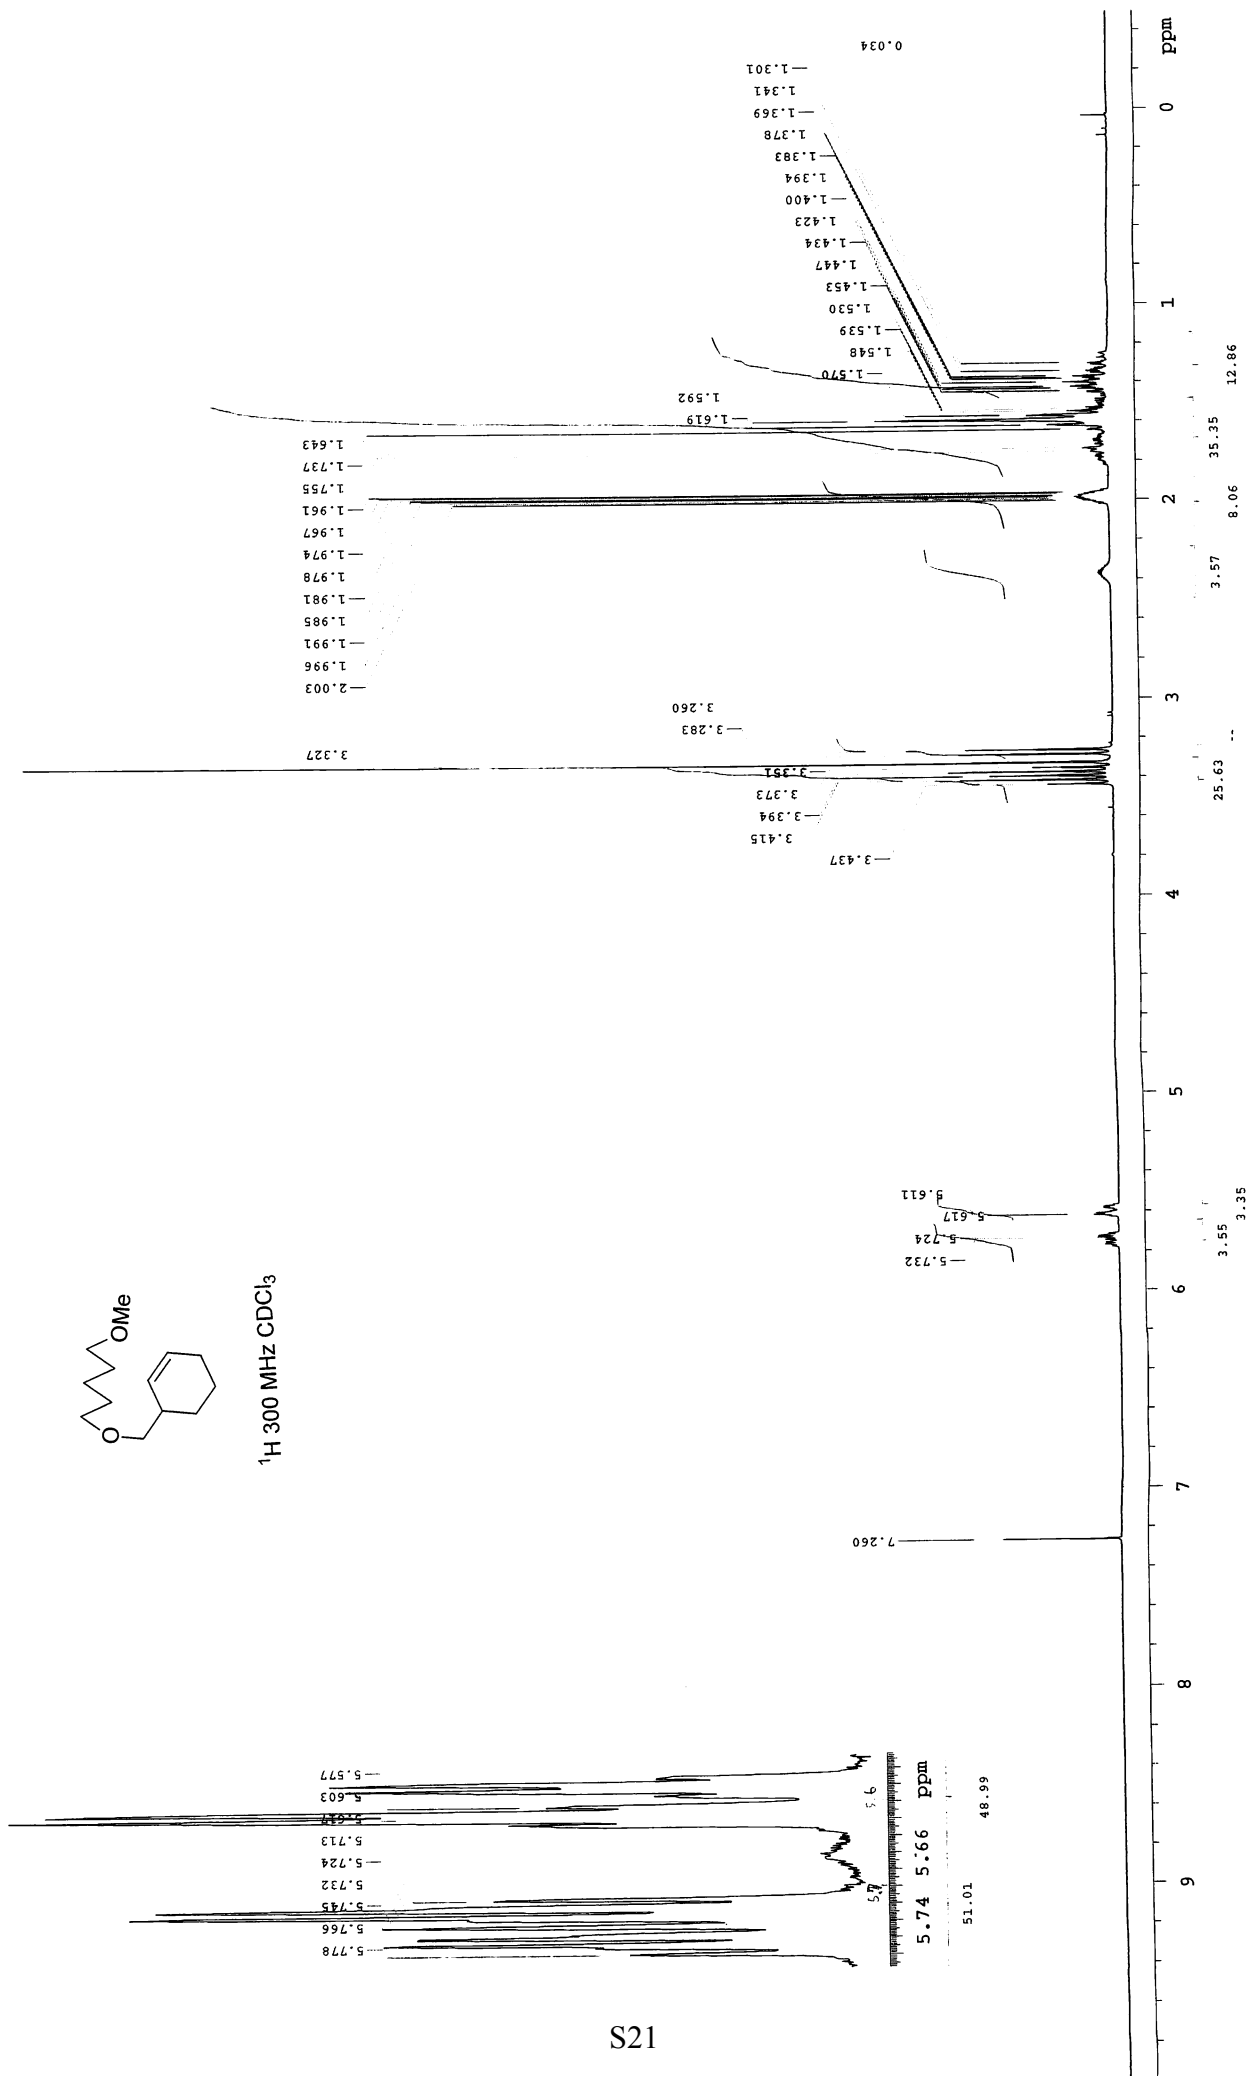

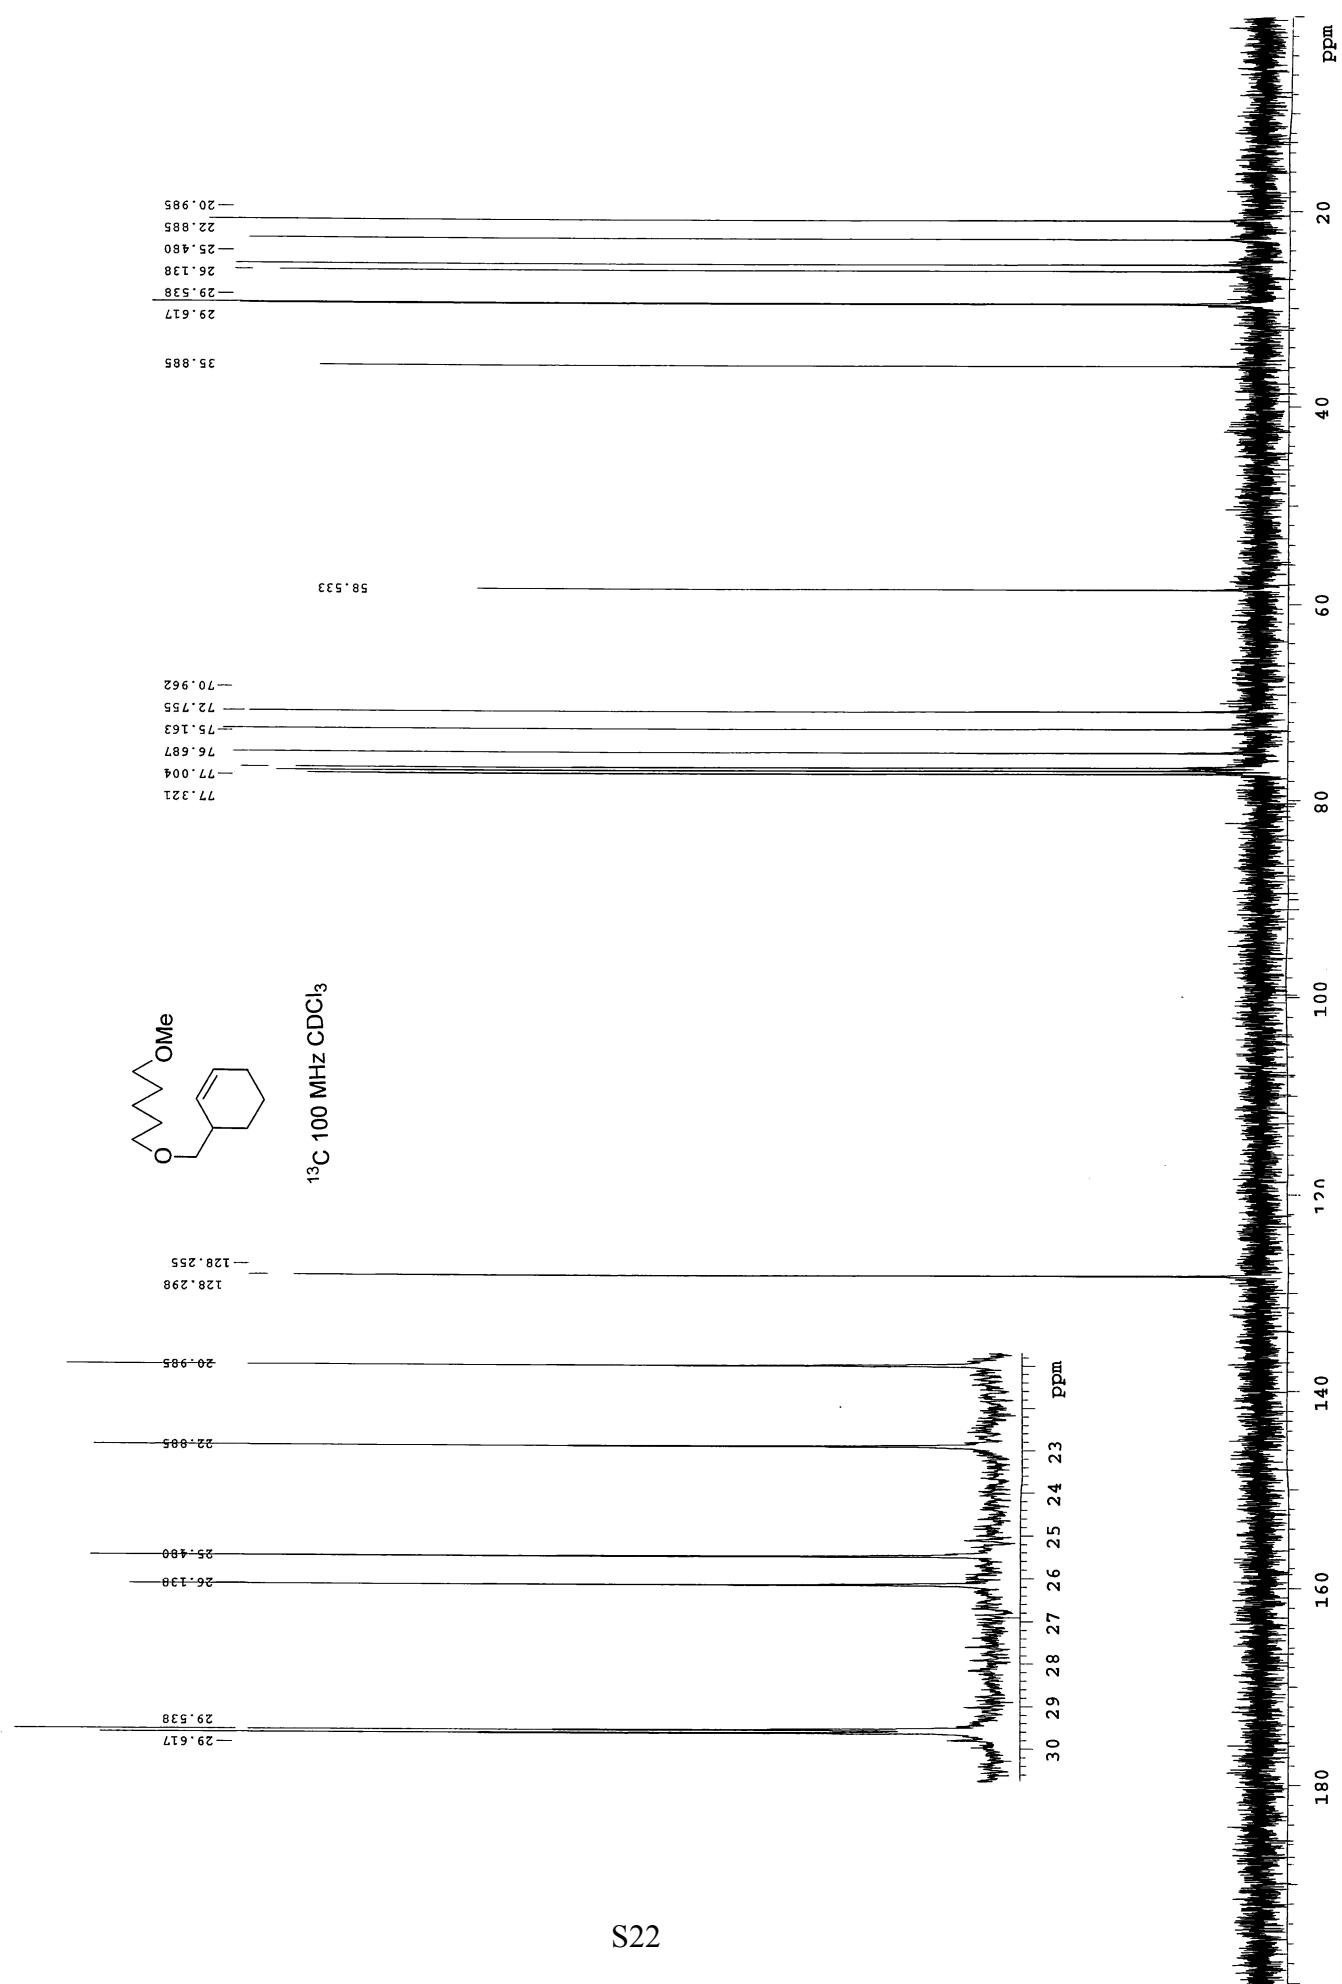

Supplement: Supplementary file 1 [file 5101159]
